# Supplementary material for: Protocol for a randomised trial of higher versus lower intensity patient–provider communication interventions to reduce antibiotic misuse in two paediatric ambulatory clinics in the USA
Source: PubMed Central journal article supplement — BMJ Open. 2018 May 9;8(5):e020981. doi: 10.1136/bmjopen-2017-020981 (PMC5942422; doi:10.1136/bmjopen-2017-020981), 2018-05-09
Supplement: bmjopen-2017-020981.draft_revisions.pdf [file bmjopen-2017-020981.draft_revisions.pdf]

# BMJ Open

BMJ Open is committed to open peer review. As part of this commitment we make the peer review history of every article we publish publicly available.

When an article is published we post the peer reviewers' comments and the authors' responses online. We also post the versions of the paper that were used during peer review. These are the versions that the peer review comments apply to.

The versions of the paper that follow are the versions that were submitted during the peer review process. They are not the versions of record or the final published versions. They should not be cited or distributed as the published version of this manuscript.

BMJ Open is an open access journal and the full, final, typeset and author-corrected version of record of the manuscript is available on our site with no access controls, subscription charges or pay-per-view fees (<http://bmjopen.bmj.com>).

If you have any questions on BMJ Open's open peer review process please email [info.bmjopen@bmj.com](mailto:info.bmjopen@bmj.com)

# BMJ Open

## **“Let’s talk about antibiotics”: A randomized trial of a higher vs. lower intensity patient-provider communication interventions to reduce antibiotic misuse in pediatric ambulatory clinics**

|                               |                                                                                                                                                                                                                                                                                                                                                                                                                                                                                                                                                                                                                                                                                                                                                                                                                                                                                                                                                                                                                                                                                                                                                                                                                                                                                                                                                                                             |
|-------------------------------|---------------------------------------------------------------------------------------------------------------------------------------------------------------------------------------------------------------------------------------------------------------------------------------------------------------------------------------------------------------------------------------------------------------------------------------------------------------------------------------------------------------------------------------------------------------------------------------------------------------------------------------------------------------------------------------------------------------------------------------------------------------------------------------------------------------------------------------------------------------------------------------------------------------------------------------------------------------------------------------------------------------------------------------------------------------------------------------------------------------------------------------------------------------------------------------------------------------------------------------------------------------------------------------------------------------------------------------------------------------------------------------------|
| Journal:                      | <i>BMJ Open</i>                                                                                                                                                                                                                                                                                                                                                                                                                                                                                                                                                                                                                                                                                                                                                                                                                                                                                                                                                                                                                                                                                                                                                                                                                                                                                                                                                                             |
| Manuscript ID                 | bmjopen-2017-020981                                                                                                                                                                                                                                                                                                                                                                                                                                                                                                                                                                                                                                                                                                                                                                                                                                                                                                                                                                                                                                                                                                                                                                                                                                                                                                                                                                         |
| Article Type:                 | Protocol                                                                                                                                                                                                                                                                                                                                                                                                                                                                                                                                                                                                                                                                                                                                                                                                                                                                                                                                                                                                                                                                                                                                                                                                                                                                                                                                                                                    |
| Date Submitted by the Author: | 05-Dec-2017                                                                                                                                                                                                                                                                                                                                                                                                                                                                                                                                                                                                                                                                                                                                                                                                                                                                                                                                                                                                                                                                                                                                                                                                                                                                                                                                                                                 |
| Complete List of Authors:     | Goggin, Kathy; Children's Mercy Hospitals and Clinics, Health Services and Outcomes Research; University of Missouri Kansas City School of Medicine<br>Bradley-Ewing, Andrea; Children's Mercy Hospitals and Clinics, Health Services and Outcomes Research<br>Myers, Angela; University of Missouri Kansas City School of Medicine; Children's Mercy Hospitals and Clinics, Infectious Diseases<br>Lee, Brian; Children's Mercy Hospitals and Clinics, Health Services and Outcomes Research; University of Missouri Kansas City School of Medicine<br>Hurley, Emily; Children's Mercy Hospitals and Clinics, Health Services and Outcomes Research<br>Delay, Kirsten; Children's Mercy Hospitals and Clinics, Health Services and Outcomes Research<br>Schlachter, Sarah; Children's Mercy Hospitals and Clinics, Health Services and Outcomes Research<br>Ramphal, Areli; Children's Mercy Hospitals and Clinics, Health Services and Outcomes Research<br>Pina, Kimberly; Children's Mercy Hospitals and Clinics, Health Services and Outcomes Research<br>Yu, David; Sunflower Medical Group<br>Weltmer, Kirsten; University of Missouri Kansas City School of Medicine<br>Linnemayr, Sebastian ; Rand Corporation<br>Butler, C; University of Oxford, Nuffield Department of Primary Care Health Sciences<br>Newland, JG; St. Louis Children's Hospital, Pediatric Infectious Disease |
| Keywords:                     | Quality in health care < HEALTH SERVICES ADMINISTRATION & MANAGEMENT, PAEDIATRICS, PRIMARY CARE, PUBLIC HEALTH                                                                                                                                                                                                                                                                                                                                                                                                                                                                                                                                                                                                                                                                                                                                                                                                                                                                                                                                                                                                                                                                                                                                                                                                                                                                              |
|                               |                                                                                                                                                                                                                                                                                                                                                                                                                                                                                                                                                                                                                                                                                                                                                                                                                                                                                                                                                                                                                                                                                                                                                                                                                                                                                                                                                                                             |

SCHOLARONE™  
Manuscripts

1  
2  
3  
4  
5  
6  
7 “Let’s talk about antibiotics”: A randomized trial of a higher vs. lower intensity patient-provider  
8 communication interventions to reduce antibiotic misuse in pediatric ambulatory clinics.  
9  
10  
11  
12  
13  
14  
15  
16  
17  
18  
19

20 Kathy Goggin<sup>1,2,3,§</sup>, Andrea Bradley-Ewing<sup>1</sup>, Angela L. Myers<sup>2,4</sup>, Brian R. Lee<sup>1,2</sup>, Emily A.  
21 Hurley<sup>1</sup>, Kirsten B. Delay<sup>1</sup>, Sarah Schlachter<sup>1</sup>, Areli Ramphal<sup>1</sup>, Kimberly Pina<sup>1</sup>, David Yu<sup>5</sup>,  
22 Kirsten Weltmer<sup>2</sup>, Sebastian Linnemayr<sup>6</sup>, Christopher C. Butler<sup>7</sup>, & Jason G. Newland<sup>8</sup>  
23  
24  
25  
26  
27

28 <sup>1</sup>Health Services and Outcomes Research, Children's Mercy Hospitals and Clinics, Kansas City  
29

30 <sup>2</sup>University of Missouri – Kansas City School of Medicine, Kansas City  
31

32 <sup>3</sup>University of Missouri – Kansas City School of Pharmacy, Kansas City  
33

34 <sup>4</sup>Infectious Diseases, Children's Mercy, Kansas City  
35

36 <sup>5</sup>Sunflower Medical Group, Kansas City  
37

38 <sup>6</sup>RAND Corporation, Santa Monica  
39

40 <sup>7</sup>Nuffield Department of Primary Care Health Sciences, University of Oxford  
41

42 <sup>8</sup>Pediatric Infectious Disease, St. Louis Children's Hospital, St. Louis  
43  
44  
45  
46

47 **§Corresponding Author:** Kathy Goggin, Children's Mercy Hospital Kansas City and University  
48 of Missouri - Kansas City, 2401 Gillham Road, Kansas City, MO 64108, +1 816 701-4481,  
49 [kgoggin@cmh.edu](mailto:kgoggin@cmh.edu)  
50  
51  
52  
53

54 Submitted December 5, 2017 (Version 1)  
55  
56  
57  
58  
59  
60

## Interventions to reduce antibiotic misuse 2

## Abstract

**Introduction:** Children with acute respiratory tract infections (ARTIs) are prescribed up to 11.4 million unnecessary antibiotic prescriptions annually. Inadequate parent-provider communication is a chief contributor, yet efforts to reduce overprescribing have only indirectly targeted communication or been impractical. This paper describes our multi-site, parallel group, randomized trial comparing two feasible interventions for enhancing parent-provider communication on the rate of inappropriate antibiotic prescribing (primary outcome) and re-visits, adverse drug reactions, and parent rated quality of shared decision-making, parent-provider communication and visit satisfaction (secondary outcomes).

**Methods/analysis:** We will attempt to recruit all eligible pediatricians and nurse practitioners (currently 47) at an academic children's hospital and a private practice. Using a 1:1 randomization, providers will be assigned to a Higher Intensity education and communication skills or Lower Intensity education only intervention and trained accordingly. We will recruit 1,600 eligible parent-child dyads. Parents of children ages 1-5 who present with ARTI symptoms will be managed by providers trained in either the Higher or Lower Intensity intervention. Before their consultation, all parents will complete a baseline survey and view a 90-second gain-framed antibiotic educational video. Parent-child dyads consulting with providers trained in the Higher Intensity intervention will, in addition, receive a gain-framed antibiotic educational brochure promoting cautious use of antibiotics and rate their interest in receiving an antibiotic which will be shared with their provider before the visit. All parents will complete a post-consultation survey and a two-week follow-up phone survey. Due to the 2-stage nested design (parents nested within providers and clinics), we will employ generalized linear mixed-effect regression models.

1  
2  
3 **Conclusion:** This trial will generate evidence about the advantage of training providers in  
4 communication skills to enhance antibiotic prescribing compared to an education only approach.  
5  
6  
7

8  
9 **Ethics/dissemination:** Ethical approval has been obtained. Results will be submitted for  
10 publication in peer-reviewed journals.  
11  
12  
13

14  
15 **Trial registration:** NCT03037112  
16  
17  
18  
19  
20  
21  
22  
23  
24  
25  
26  
27  
28  
29  
30  
31  
32  
33  
34  
35  
36  
37  
38  
39  
40  
41  
42  
43  
44  
45  
46  
47  
48  
49  
50  
51  
52  
53  
54  
55  
56  
57  
58  
59  
60

### Strengths and limitations

- Implements a parent-provider communication intervention based on a previously effective intervention and adapted for feasibility in the US pediatric ambulatory setting.
- Works closely with parent, provider and other stakeholders to ensure the feasibility and appropriateness of the interventions' components and study procedures.
- All educational materials and assessments will be available in Spanish and are being developed in consultation with Spanish-speaking stakeholders.
- Adequately powered to detect differences between the Higher and Lower Intensity interventions, with a 1:1 randomization of providers to intervention arms and a target sample of 1600 parents/child dyads.
- Data on primary outcomes (i.e., rates of inappropriate antibiotic prescribing), secondary outcomes (i.e., re-visits and adverse drug reactions, shared decision-making, quality of parent-provider communication and satisfaction), and potential covariates will yield novel insights into the effectiveness of each intervention.

1  
2  
3 Antibiotic overuse and misuse contribute to the development of antibiotic resistant  
4 infections that if left unchecked are estimated to cause 10 million deaths worldwide by 2050.<sup>1</sup> In  
5 the United States (US), antibiotic resistant infections are responsible for at least 23,000 deaths  
6 and an additional 2 million infections annually.<sup>2</sup> Inappropriate antibiotic use also increases  
7 incidence of antibiotic-associated adverse drug reactions (e.g., rash, diarrhea, nausea, and  
8 vomiting), which result in over 140,000 Emergency Department visits every year.<sup>3</sup>

9  
10  
11 The majority of all antibiotic prescribing in the US occurs in the outpatient setting where  
12 children receive 49 million prescriptions annually.<sup>4</sup> Children with acute respiratory tract  
13 infections (ARTIs) receive over 70% of these prescriptions of which 29% are unnecessary (i.e.,  
14 either to treat a viral illness or an unnecessary broad-spectrum antibiotic).<sup>4</sup> Despite some  
15 improvements, the most recent estimates suggest that antibiotics are prescribed for  
16 approximately 50% of ARTIs while it is estimated that only 27% of ARTIs are caused by  
17 bacterial infection.<sup>5</sup> As a result, children are receiving up to 11.4 million unnecessary antibiotic  
18 prescriptions annually.<sup>5</sup> Strikingly, an almost identical number was noted in a similar study  
19 conducted 16 years earlier (11.1 million unnecessary antibiotic prescriptions) suggesting there  
20 are considerable gains still to be made in reducing inappropriate use.<sup>6</sup>

21  
22  
23 Inappropriate antibiotic prescribing in the ambulatory setting has many causes, but the  
24 interaction between parents/legal guardians (hereafter referred to as parents) and providers is  
25 central. For their part, some parents still harbor misconceptions that make them think antibiotics  
26 are necessary when they aren't.<sup>7</sup> Nevertheless, parents generally desire antibiotics for their  
27 children only when absolutely necessary<sup>8</sup> and do not expect antibiotics for common colds.<sup>9</sup>  
28 Instead, parents become dissatisfied when providers minimize children's symptoms, fail to  
29 acknowledge parents' appropriate concerns and/or do not offer a contingency plan if symptoms  
30 fail to resolve.<sup>10,11</sup>

31  
32  
33 Despite evidence to the contrary, providers perceive significant parental pressure for  
34 antibiotics and fear damaging the parent-provider relationship if they withhold prescriptions.<sup>12,13</sup>

## Interventions to reduce antibiotic misuse 6

1  
2  
3 Combined with the ever-increasing time constraints and focus on parent satisfaction ratings  
4 inherent in modern clinical practice, these beliefs greatly contribute to ineffective parent-provider  
5 communication about antibiotics. When providers perceive that a parent expects or hopes for  
6 an antibiotic, they are more likely to prescribe one.<sup>14,15</sup> In a study of children with viral ARTIs  
7 where no prescription should have been given, providers gave a prescription to 52% of parents  
8 they believed were expecting an antibiotic as compared to only 9% of parents who they believed  
9 were not expecting an antibiotic.<sup>16</sup> Adding to this problem is providers' mistaken belief that they  
10 can accurately predict parents' desires. In fact, providers' ability to accurately predict parents'  
11 expectation for an antibiotic is significantly worse than chance at 24% to 41% concordance.<sup>12,16</sup>  
12 Even though parents rarely state a desire for antibiotics (1% of the time in clinical recordings)  
13 providers report frequent parent demands for antibiotics.<sup>17</sup> Providers also mistakenly believe  
14 that meeting perceived parental expectations for antibiotics is necessary for parent  
15 satisfaction.<sup>13</sup> Parental satisfaction, however, is not related so much to whether or not they  
16 receive an antibiotic but more to the quality of communication with their provider.<sup>10,13</sup> In fact, a  
17 recent observational study demonstrated that the use of what they termed "positive treatment  
18 recommendations" (i.e., comfort care) plus "negative treatment recommendations" (i.e.,  
19 antibiotics won't help) was associated with the highest parent satisfaction.<sup>18</sup>

20  
21  
22  
23  
24  
25  
26  
27  
28  
29  
30  
31  
32  
33  
34  
35  
36  
37  
38  
39  
40 Current efforts to improve appropriate antibiotic use have only indirectly targeted parent-  
41 provider communication<sup>19,20</sup> or have been found to be impractical.<sup>21</sup> As described in several  
42 meta-analytic and systematic reviews, interventions have typically focused on education about  
43 antibiotics for providers or patients.<sup>19,20</sup> While many have been successful in increasing  
44 knowledge about antibiotics and nationally antibiotic prescribing has evidenced modest  
45 reductions,<sup>8,22</sup> more effective strategies that go beyond educational targets are needed to  
46 reduce overprescribing rates to levels that will have a significant impact. A limited number of  
47 studies have been conducted that target parent-provider communication or shared decision-  
48  
49  
50  
51  
52  
53  
54  
55  
56  
57  
58  
59  
60



1  
2  
3 making, and they have already produced superior results.<sup>20</sup> Of the communication interventions  
4  
5 tested, only one has directly targeted provider perceptions of parental expectations alongside  
6  
7 antibiotic education and shared decision-making.<sup>23</sup> This study, which employed intensive  
8  
9 provider training and a multi-page patient-provider interactive educational booklet, resulted in a  
10  
11 significant decrease in antibiotic use. The intervention, however, was viewed as burdensome by  
12  
13 providers and impractical for most real world settings.<sup>21</sup> Effective, practical interventions are  
14  
15 needed that address provider misconceptions about parent expectations, facilitate shared-  
16  
17 decision making, and improve aspects of communication that are most likely to increase  
18  
19 parental satisfaction.  
20  
21

22 The goal of this study is to compare two feasible interventions for enhancing parent-  
23  
24 provider communication to reduce the rate of inappropriate antibiotic prescribing. This study will  
25  
26 compare the efficacy of a Higher Intensity provider education and communication skills  
27  
28 intervention to a Lower Intensity provider education only intervention. We hypothesize that the  
29  
30 parent-child dyads managed by providers trained in the Higher Intensity intervention will  
31  
32 demonstrate superiority to dyads managed by providers trained in the Lower Intensity  
33  
34 intervention on the primary outcome of rate of inappropriate antibiotic prescribing, as well as,  
35  
36 the secondary outcomes of re-visits, adverse drug reactions, and parent rated quality of shared  
37  
38 decision making, parent-provider communication and satisfaction.  
39  
40  
41

## 42 **Methods**

### 43 *Trial design, setting and participants*

44  
45  
46  
47 **Trial design:** A multi-site parallel group, randomized trial with balanced randomization (1:1) will  
48  
49 be performed in three ambulatory pediatric clinics in the United States. Providers (physicians  
50  
51 and nurse practitioners) will be randomly assigned to training in either Higher Intensity or Lower  
52  
53 Intensity intervention described below. Once providers have been randomized and trained,  
54  
55 eligible parent-child dyads will be enrolled and exposed to management by a provider who was  
56  
57  
58  
59  
60

## Interventions to reduce antibiotic misuse 8

1  
2  
3 trained in one of the interventions. Parents in both arms will receive education on the pros and  
4 cons of antibiotics for common infections and tips for communicating with their provider. Blinding  
5 of providers will not be feasible in this study, however, parents will be blinded as they will not be  
6 told what study arm their provider is in, nor informed about differences between the study  
7 interventions. Study team members who conduct chart review to code appropriateness of  
8 antibiotic prescriptions and code session audiotapes for intervention fidelity will be blinded. The  
9 study protocol is in compliance with the Helsinki Declaration and was reviewed and approved by  
10 the Institutional Review Board of Children's Mercy Hospital (#16060466). PI (KG) will monitor  
11 recruitment, retention (bimonthly) and adverse events (quarterly; blinded to study arm) in this  
12 low risk study. Adverse events, collected from parents at 2-week follow-up, through chart review  
13 and spontaneously from clinic staff. Any protocol modifications will be submitted for IRB review  
14 and communicated to all relevant parties before implementation.

15  
16  
17  
18  
19  
20  
21  
22  
23  
24  
25  
26  
27  
28  
29  
30  
31 **Randomization:** To protect against practice effects (tendency for providers to have more  
32 consistent beliefs and behaviors within their practice as compared to providers in other  
33 practices), we will randomize providers rather than clinic sites. We did this because the  
34 intervention components are not easily transferred between providers making the risk of  
35 contamination a much smaller threat to validity than practice effects. As detailed below in the  
36 Higher Intensity Provider Training section, we will employ several strategies to reduce the  
37 chance of contamination across study arms. We will use clinic data on visits among our target  
38 population from the past six months to assign each provider to a large or small patient volume  
39 group. The study statistician will then stratify the randomization of providers to ensure each  
40 study arm is balanced across large and small volume providers and across clinics. The study  
41 statistician will place the intervention group assignment in sealed envelopes labeled with  
42 providers' names. Providers will be given their envelopes at the conclusion of a brief study  
43 orientation and informed consent meeting and before completing the baseline assessment.

1  
2  
3  
4  
5 **Setting:** Study sites will be an academic medical center (Children's Mercy Hospital Primary  
6 Care Clinic - CMH PCC) and both locations of a private practice (Heartland Primary Care -  
7 HPC). CMH PCC sees a racially and ethnically diverse group of patients (41% African  
8 American/Black, 29% Hispanic, 18% White) from the Kansas City metropolitan area, of which  
9 73% are covered by Medicaid. CMH PCC has 38 providers (28 pediatricians and 10 nurse  
10 practitioners) and treats approximately 2100 children with an ARTI that meet study inclusion  
11 criteria yearly. HPC is a community-based private practice with two locations in sub-urban  
12 Kansas City serving a diverse patient population (14% African American/Black, 16% Hispanic,  
13 75% White; 42% covered by Medicaid). HPC has 9 pediatric providers (6 pediatricians and 3  
14 nurse practitioners) who care for 2000 children that meet study inclusion criteria annually.  
15 Approximately 20% of parents at study sites are Spanish speaking.  
16  
17  
18  
19  
20  
21  
22  
23  
24  
25  
26  
27  
28  
29

30 **Participants:** This study involves providers and parent-child dyads. We will attempt to recruit all  
31 eligible providers at all study sites (pediatricians, pediatric nurse practitioners; n = 47), defined  
32 as those who regularly treat patients that meet our inclusion criteria. Providers primarily  
33 assigned to administration, urgent care or specialty clinics that serve complex care patients will  
34 not be eligible. We will conduct brief study orientation and informed consent meetings to enroll  
35 providers during regularly scheduled clinic meetings or individual contacts.  
36  
37  
38  
39  
40  
41  
42  
43  
44

45 We will recruit up to 1600 parent-child dyads. Dyads will be eligible if the patient is between  
46 ages 1-5 years (i.e., before sixth birthday), presents with ARTI symptoms (e.g., cough,  
47 congestion, difficulty breathing, sore throat, ear ache) and his/her parent is fluent in English or  
48 Spanish. Children will not be eligible if they have received an antibiotic in the last 30 days, have  
49 a concurrent probable bacterial infection (e.g., UTI, soft tissue infections), known  
50 immunocompromising conditions (e.g., HIV, malignancy, solid-organ transplant, chronic  
51  
52  
53  
54  
55  
56  
57  
58  
59  
60

## Interventions to reduce antibiotic misuse 10

1  
2  
3 corticosteroid use), or factors that make shared decision-making around prescribing an  
4 antibiotic extremely complex, like children with complex chronic care conditions (e.g., cystic  
5 fibrosis),<sup>24</sup> or who require hospitalization during the visit. We will include patients with penicillin  
6 allergy as shared decision-making with this group is especially important given more limited  
7 treatment options. Parents or children who have previously participated in the study will not be  
8 eligible to participate again. Potentially eligible dyads will be identified through prescreening all  
9 appointments and parents will be given a study flyer upon check-in. Potential eligible dyads will  
10 be greeted in the exam room before the provider arrives, given a short synopsis of the study,  
11 and offered eligibility screening. If more than one caregiver is with the child, they will be asked  
12 to designate one person who will complete the informed consent and all assessments.  
13  
14  
15  
16  
17  
18  
19  
20  
21  
22  
23  
24  
25  
26

*Trial Interventions*

27  
28  
29  
30 **Higher Intensity Intervention.** With attention to the feasibility in the US healthcare system, this  
31 intervention will be informed by a series of evidence-based interventions conducted in the UK  
32 and Europe: Enhancing the Quality of Information-sharing in Primary care (EQUIP),<sup>23,25</sup>  
33 Improving the Management of Patients with Acute Cough Trial (IMPACT),<sup>26,27</sup> Stemming the  
34 Tide of Antibiotic Resistance (STAR)<sup>28,29</sup> and Genomics to combat Resistance against  
35 Antibiotics in Community-acquired LRTI in Europe (GRACE).<sup>30</sup>  
36  
37  
38  
39  
40  
41  
42  
43  
44

45 **Higher Intensity Arm Provider Training:** Providers in this arm will receive two trainings. First,  
46 a 20-minute, in-person general education training provided by a study physician (ALM, JGN) will  
47 cover the pros and cons of antibiotics, the impact of inappropriate use, CDC antibiotic  
48 prescribing guidelines, common reasons for antibiotic misuse, and viewing/discussion of the  
49 parent educational cartoon (described below). Didactic and interactive learning strategies will be  
50 employed to review the appropriate diagnostic criteria to help distinguish a viral ARTI from a  
51  
52  
53  
54  
55  
56  
57  
58  
59  
60

1  
2  
3 bacterial ARTI, as well as, the recommended narrow spectrum antibiotic for bacterial ARTI.  
4  
5 Second, providers will receive a 50-minute, in-person training on parent-centered  
6  
7 communication skills provided by a behavioral psychologists (KG). The training will use a variety  
8  
9 of educational strategies including viewing/discussion of motivational and role model videos,  
10  
11 lecture, and group discussion. The goal is to enhance providers' confidence in use of parent-  
12  
13 centered communication strategies (e.g., open ended questions, affirming and elicit-provide-  
14  
15 elicit) and the study tri-fold brochure to conduct key aspects of the  
16  
17 EQUIP/IMPACT/STAR/GRACE interventions during consultations. Specifically, they will learn  
18  
19 to: 1) elicit parents' expectations, 2) affirm parents' concerns, 3) provide an evidence-based  
20  
21 estimate of likely illness duration, 4) provide gain-framed antibiotic information, 5) recommend  
22  
23 options for symptom relief, 6) identify triggers for re-consult and contingency plans, and 7) elicit  
24  
25 parents thoughts on the plan. Providers will also learn to use the study tri-fold brochure to  
26  
27 ensure that they complete all necessary aspects of the intervention and provide written notes for  
28  
29 parents to refer to after the visit. The inside of the study tri-fold brochure provides gain-framed  
30  
31 information about when antibiotics are and are not necessary and what risks are involved in  
32  
33 taking antibiotics. Research has shown that people react to the same tradeoff in different ways  
34  
35 depending on whether the possible outcomes are presented as losses or gains.<sup>31</sup> In this study,  
36  
37 we will train providers and tailor our parent materials to highlight the gains of not using  
38  
39 antibiotics (e.g., staying safe from side effects, making sure that effective cures are available in  
40  
41 the future, knowing that their child's body will fight off most ARTI on its own) that may increase  
42  
43 parents' comfort with not getting an antibiotic prescription for their child. Drawing from the  
44  
45 EQUIP study,<sup>25</sup> the outside of the brochure includes a place to write the child's first name; check  
46  
47 boxes to indicate the diagnosis, recommended home care treatments, and reasons for re-  
48  
49 consultation; expected recovery time, if antibiotics are needed, and tips for communicating with  
50  
51 providers.  
52  
53  
54

55  
56 To reduce their reliance on guessing what parents want, providers will also be trained to  
57  
58  
59

## Interventions to reduce antibiotic misuse 12

1  
2  
3 rely on parents' antibiotic desire ratings taken from their baseline survey and provided at the  
4 start of each visit via a sticky note on the exam room door where parent-child dyads will be  
5 waiting. To assess fidelity to the communication skills, we will audio record a subsample of visits  
6 (10%) in both Higher and Lower Intensity arms and objectively code use of key communication  
7 strategies using established methods that we have successfully employed in other studies.<sup>32,33</sup>  
8  
9 We will deliver in-person provider training as studies have shown the value of an active  
10 approach over more passive web-based versions,<sup>34</sup> but we will also develop web-based  
11 refresher trainings.  
12  
13  
14  
15  
16  
17  
18  
19  
20  
21

22 **Higher Intensity Arm Parent Training:** In exam rooms prior to the consultation, parents will  
23 complete the baseline survey, view a 90 second educational cartoon video with accompanying  
24 educational tri-fold brochure and rate their desire for antibiotics via a tablet computer. The  
25 educational video uses gain-framed messages<sup>31,35</sup> to explain when antibiotics are and are not  
26 indicated while emphasizing the risk of side effects and the creation of resistant organisms. It  
27 also highlights what information should be provided during the consultation (e.g., an estimate of  
28 illness duration, recommendations for system relief, and triggers for re-consult and contingency  
29 plans). Parents in this arm will receive a hard copy of the study tri-old brochure.  
30  
31  
32  
33  
34  
35  
36  
37  
38  
39  
40

41 **Lower Intensity Intervention:** This intervention will be modeled on proven parent and provider  
42 focused educational interventions used in previous studies.<sup>19,34,36-44</sup> Providers will complete the  
43 same 20 minute, in-person general education training described above. Parents will receive the  
44 same parent training described above except that parents will not receive a hard copy of the  
45 study tri-fold brochure and their antibiotic desire ratings will not be shared with providers.  
46  
47  
48  
49  
50

51 Several measures will be taken to reduce the likelihood of contamination between arms.  
52 Specifically, we will: 1) ensure that any communications (written or in person) with providers in  
53 the Lower Intensity arm do not reveal any of the strategies from the Higher Intensity training, 2)  
54  
55  
56  
57  
58  
59  
60

1  
2  
3 review the importance of keeping intervention arms distinct in RCT designs during training, 3)  
4 directly ask providers to pledge not to share any details of the additional communication skills  
5 training with their colleagues randomized to the Lower Intensity arm, 4) control the  
6 dissemination of the tri-fold brochure to ensure that only parents who are consulted by providers  
7 in the Higher Intensity arm receive them, and 5) offer communication strategies for dealing with  
8 colleagues who ask for more information.  
9  
10  
11  
12  
13  
14

### 15 16 17 18 *Data Collection*

19  
20 **Providers/Administrators:** At baseline, providers will complete a brief survey collecting  
21 demographic data, and providers' views on parent interest in antibiotics for viral illness, their  
22 comfort with telling parents that antibiotics are not necessary, and their concern about parents'  
23 responses. Once parent-child dyad recruitment is complete, a brief survey mirroring the  
24 baseline provider assessment and a brief (<10 min) semi-structured individual interview will be  
25 conducted with providers and administrators to learn about their experience of being in the  
26 study, suggestions for improvement and ideas about disseminating to other settings.  
27  
28  
29  
30  
31  
32  
33

34  
35 Providers/Administrators will not receive incentives for study participation.  
36  
37  
38  
39

40 **Parents:** At baseline, immediately before their scheduled visit with a provider, parents will  
41 complete a brief tablet computer administered Research Electronic Data Capture (REDCap)  
42 survey about their antibiotic knowledge and interest in antibiotics for their child's current  
43 condition. They will then view the educational video and indicate their interest in antibiotics for  
44 their child's current condition again and rate the likelihood of actually receiving antibiotics during  
45 their visit. After meeting with their provider, parents will complete a brief survey about their  
46 experience of the visit including their rating of shared decision making, satisfaction with parent-  
47 provider communication and overall satisfaction with the visit. Two weeks later, parents will be  
48  
49  
50  
51  
52  
53  
54  
55  
56  
57  
58  
59  
60



## Interventions to reduce antibiotic misuse 14

1  
2  
3 contacted via phone to complete a follow-up survey to assess: resolution of child's illness, any  
4 additional healthcare visits and/or treatment, if contingency or "back-up" prescriptions were  
5 filled, presence and severity of side effects from any antibiotics administered, use of home care  
6 treatment suggested by provider, assessment of the educational video and brochure, and  
7 satisfaction with study participation. EMR data will be abstracted using a standardized data  
8 collection form and evaluated by study physicians to determine the appropriateness of antibiotic  
9 prescribing. Parents will be provided with \$10 per completed survey in recognition of their time  
10 and effort.  
11  
12  
13  
14  
15  
16  
17  
18  
19

### 20 *Measures*

21 Interest in assessing patient/parent-provider communication has garnered significant attention,  
22 but measurement challenges remain. Despite a large number of published instruments,  
23 availability of valid, reliable, and scalable measures is a recognized barrier to progress in  
24 research and implementation of patient-centered care.<sup>45</sup> Lack of patient involvement in scale  
25 development has been cited as a contributing factor, so we have engaged parent and provider  
26 stakeholders in the selection of measures for this study. All measures have been adapted based  
27 on their feedback, pilot testing including cognitive debriefing was performed to ensure the  
28 briefest possible assessment of study outcomes. All measures were translated into Spanish  
29 using standard methods and appropriate pilot testing.  
30  
31  
32  
33  
34  
35  
36  
37  
38  
39  
40  
41

### 42 *Primary Outcome*

43  
44 **Antibiotic Prescribing:** Our primary research question is which of the two interventions leads  
45 to a lower rate of inappropriate antibiotic prescribing. We hypothesize that the rate among  
46 providers in the Higher Intensity arm will be lower than the rate produced by providers in the  
47 Lower Intensity arm. If the rates do not significantly differ, we will conclude that the Lower  
48 Intensity intervention is superior and should be considered for dissemination. Inappropriate  
49 prescribing will be assessed on a weekly basis by study physicians, blinded to study arm, who  
50  
51  
52  
53  
54  
55  
56  
57  
58  
59  
60



will review the medical record documentation for each enrolled patient's visit to determine if inappropriate

antibiotic prescribing occurred.

Prescriptions will be considered

inappropriate if they meet any of the following criteria: 1)

**Table 1. Diagnostic criteria for ARTIs** <sup>19,36,34,46,47</sup>

| Bacterial ARTI                                 | Diagnostic criteria                                                                                                                                                                                                                                                                                                                                               |
|------------------------------------------------|-------------------------------------------------------------------------------------------------------------------------------------------------------------------------------------------------------------------------------------------------------------------------------------------------------------------------------------------------------------------|
| Acute Otitis Media (either criteria)           | 1. Fever $\geq 38.3^{\circ}\text{C}$ ( $101^{\circ}\text{F}$ ) with either a or b:<br>a. Moderate to severe bulging of tympanic membrane on exam, or<br>b. Mild bulging of TM and recent (<48hrs) onset of ear pain<br>2. New onset of otorrhea not due to acute otitis externa                                                                                   |
| Sinusitis (any of the 3 criteria)              | 1. Daytime cough or nasal discharge for greater than 10 days<br>2. High fever ( $>39^{\circ}\text{C}$ ) with purulent nasal discharge or facial pain lasting 3 consecutive days at the beginning of the illness<br>3. Worsening signs or symptoms characterized by the new onset of fever, headache, or increase in nasal discharge following a typical viral URI |
| Community acquired Pneumonia (either criteria) | 1. Fever, tachypnea, and focal findings on pulmonary exam<br>2. a) Fever, b) Tachypnea, cough, or retractions AND c) Chest radiograph consistent with a focal consolidation                                                                                                                                                                                       |
| Streptococcal pharyngitis (both criteria)      | 1. Fever, pharyngitis, & positive rapid streptococcal antigen test or culture<br>2. Lack of viral signs and symptoms                                                                                                                                                                                                                                              |

antibiotic prescribed for a viral ARTI, 2) antibiotic prescribed for a presumed bacterial ARTI that does not meet Table 1 criteria, 3) broad-spectrum antibiotic prescribed for a bacterial ARTI in a child without a penicillin allergy, or 4) non-recommended alternative antibiotic prescribed for a bacterial ARTI (see Table 2) in a child with a penicillin allergy. Instead of relying on diagnostic codes as has been done in previous

studies,<sup>46,48</sup> the study physicians will assess the appropriateness of the patient's diagnosis by reviewing detailed symptoms, physical examination findings, and diagnostic

**Table 2. Appropriate Antibiotic Selection** <sup>19,36,46,47</sup>

| Bacterial ARTI               | Primary Antibiotic | Secondary Antibiotics for Penicillin Allergy                                                                       |
|------------------------------|--------------------|--------------------------------------------------------------------------------------------------------------------|
| Acute Otitis Media           | amoxicillin        | cefdinir, cefpodoxime, ceftriaxone, cefuroxime, clindamycin                                                        |
| Community-acquired Pneumonia | amoxicillin        | cefpodoxime, cefprozil, cefuroxime, clindamycin                                                                    |
| Sinusitis                    | amoxicillin        | cefdinir, cefpodoxime, cefuroxime, clindamycin                                                                     |
| Streptococcal pharyngitis    | amoxicillin        | cephalexin (preferred unless previous type I hypersensitivity reaction to penicillin)<br>clindamycin, azithromycin |

tests in the EMR. This will guard against the potential bias of relying on diagnostic codes alone, as clinicians sometimes match diagnostic codes to support their antibiotic prescribing.<sup>12</sup>

Children determined to have a bacterial infection will need documentation of the specific diagnoses and the clinical criteria confirming that diagnosis (listed in Table 1). Ten percent of all chart reviews will be verified by the other study physician blinded to the initial coding and study group.

## Interventions to reduce antibiotic misuse 16

*Secondary Outcomes*

**Re-visits and Adverse Drug Reactions:** We will determine if children seen by providers in the two study arms differ in terms of re-visits and/or adverse drug reactions. Data on these clinical outcomes will be collected via follow-up phone calls with parents conducted two weeks after the visit. Parents will be asked if any additional healthcare visits and/or treatment occurred and, if antibiotics were given to the child, if any side effects or adverse drug reactions occurred.

Parents will also be asked to report on when their child's symptoms improved, if contingency prescriptions were filled, use of home care treatment suggested by the provider, assessment of the educational video and brochure, and satisfaction with study participation.

**Shared Decision-Making:** We will assess parent ratings of shared decision-making using an adapted version of the 3-item CollaboRATE questionnaire.<sup>49</sup> This very brief (< 30 seconds) scale was developed with input of end-users and assesses the "effort" that providers put forward to initiate shared decision-making. Members of our CAB and participants in several studies have strongly preferred the CollaboRATE scale to other measures of shared decision-making, especially for more routine health care issues.<sup>50</sup> Items are: "How much effort was made to... (1) help you understand your child's health issue?; (2) listen to the things that matter most to you about your child's health issues?; and (3) include what matters most to you in choosing what to do next?" Items are scored on a 10-point response scale ranging from 0 "No effort was made" to 9 "Every effort was made." In a simulation study the CollaboRATE scale demonstrated discriminative validity between 6 standardized patient-provider encounters that included varied amounts of shared decision making, concurrent validity with other measures of SDM, excellent test-retest reliability, and sensitivity to change.<sup>51</sup>

**Quality of Parent-Provider Communication:** We will use a single item: "How satisfied were you with the communication between you and your child's health care provider?" with a five

1  
2  
3 point Likert type response format ranging from “Very dissatisfied” to “Very satisfied.”  
4  
5

6  
7 **Overall Satisfaction with the Visit:** We will use a single item: “Overall, how satisfied were you  
8 with the visit?” with a five point Likert type response format ranging from “Very dissatisfied” to  
9 “Very satisfied.”  
10  
11  
12

### 13 14 15 *Data Analyses*

#### 16 17 18 Power and sample size

19  
20 Prior research examining our primary outcome has shown that 30% of the antibiotics prescribed  
21 in the outpatient ARTI visits are inappropriate.<sup>5</sup> Prior behavioral intervention studies have  
22 produced 20% to 81% reductions in inappropriate prescribing,<sup>46,47</sup> with statistically significant  
23 differences between intervention and control arms (effect sizes: 8.3%<sup>46</sup> and 13.1%<sup>47</sup>). Based on  
24 the ICC observed in the Meeker et al. study which is most similar to our study, we assume an  
25 ICC of .04. Assuming 30% inappropriate prescribing at baseline and a 20% decrease in the  
26 Lower Intensity arm and a conservative 50% decrease in the Higher Intensity arm following  
27 intervention, with 40 providers (clusters),  $\alpha$  of .05, and 80% power, we will need a sample size  
28 of 760 per arm to detect a 9% difference between arms (inappropriate antibiotic 24% in Lower  
29 Intensity arm vs. 15% in Higher Intensity arm after intervention). Consistent with our historical  
30 retention rates in similar studies in the same setting, we will protect against an attrition rate of  
31 5% and aim to recruit 1,600 participants to ensure adequate power to assess our primary  
32 outcome and secondary outcomes.  
33  
34  
35  
36  
37  
38  
39  
40  
41  
42  
43  
44  
45  
46

#### 47 48 Planned statistical analyses

49  
50 Missing Data: All analyses will be conducted using an intent-to-treat strategy with available data.  
51 We do not anticipate important amounts of missing data, as all data for primary outcomes are  
52  
53  
54  
55  
56  
57  
58  
59  
60

## Interventions to reduce antibiotic misuse 18

1  
2  
3 collected in a single visit before incentives are offered and we will require responses in the  
4  
5 REDCap form.  
6

7  
8 Analytic strategy: Initial analyses will examine the underlying distributions of the primary and  
9  
10 secondary outcomes. “Ceiling effects” on these measures of parent satisfaction are not  
11  
12 uncommon and depending on the level of skewness, we may elect to dichotomize specific  
13  
14 scales. We will construct an analytic model to assess the impact of intervention type on our  
15  
16 primary outcome of inappropriate antibiotic prescribing. This is a 2-stage nested design, with  
17  
18 parents nested within providers (Level-1 units) and study site (Level-2 units). Consequently,  
19  
20 ordinary least squares (OLS) and logistic regression models are not appropriate since the data  
21  
22 violate the independently and identically distributed (IID) assumption. We will use generalized  
23  
24 linear mixed-effect regression models (GLMM) using Stata<sup>52</sup> which allow for easy specification  
25  
26 of both fixed and random effects, including accommodating  $\geq 1$  cluster variables. Alternative  
27  
28 covariance structures will be investigated; though we hypothesize the exchangeable (or  
29  
30 compound symmetry) structure will suffice. We will employ robust standard errors to help  
31  
32 minimize misspecification and examine time as a potential random effect. The data will be  
33  
34 analyzed using a post-test only approach. Next, we will examine the effects of the potential  
35  
36 covariates (e.g., parent/patient’s gender, insurance type, parent’s self-reported race and  
37  
38 ethnicity, parent’s educational attainment and provider’s years of clinical experience) on the  
39  
40 primary and secondary outcomes. Our goal is to identify parsimonious final models with the  
41  
42 fewest covariates that best describe the outcomes.  
43  
44

45  
46 Additionally, we will explore the heterogeneity of treatment effect, or the possibility that one or  
47  
48 both of the interventions work better for specific groups. Variables for consideration include:  
49  
50 language spoken at home, language the visit was conducted in, and age of child. We will create  
51  
52 a binary indicator for each variable and include each as an interaction term in the regression  
53  
54  
55  
56  
57  
58  
59  
60

1  
2  
3 models. We will examine these interaction terms across intervention arms and explore within-  
4  
5 arm differential trends in our primary and secondary outcomes over time.  
6  
7

## 8 9 **Discussion**

10 Effective parent-provider communication facilitates rapport-building, exchange of critical  
11  
12 information, and shared decision-making which ultimately has the potential to reduce  
13  
14 inappropriate antibiotic prescribing and use. Nevertheless, efficacious and feasible training  
15  
16 interventions that enhance effective parent-provider communication, shared decision making  
17  
18 and antibiotic prescribing are lacking. This study will be the first to compare the efficacy of two  
19  
20 interventions directly targeting parent-provider communication about antibiotics in the US  
21  
22 outpatient pediatric setting. It will also provide novel insights about parental expectations for  
23  
24 antibiotics following the receipt of gain-framed information and providers' experience of the  
25  
26 interventions. If successful, the superior intervention could be widely disseminated and  
27  
28 potentially lead to reduced health care costs through more appropriate antibiotic use, decreased  
29  
30 additional visits by parents who may not have felt satisfied with their initial visit and ultimately  
31  
32 less antibiotic resistance.  
33  
34  
35  
36  
37  
38  
39  
40  
41  
42  
43  
44  
45  
46  
47  
48  
49  
50  
51  
52  
53  
54  
55  
56  
57  
58  
59  
60

## Acknowledgements

Research reported in this publication was supported through a Patient-Centered Outcomes Research Institute (PCORI) Program Award (CDR-1507-31759). All statements in this report, including its findings and conclusions, are solely those of the authors and do not necessarily represent the views of the Patient-Centered Outcomes Research Institute (PCORI), its Board of Governors or Methodology Committee. The authors wish to acknowledge the contributions by parent stakeholders on our Community Advisory Board and clinical stakeholders at Children's Mercy Primary Care Clinics and Heartland Clinics in designing this study. The authors declare no competing interests.

## Author Contributions

All authors made substantial contributions to the design of the study. KG, ABE, ALM, BRL, EAH and JGN contributed to drafting the protocol and revising it critically for important intellectual content. KBD SS AR KP DY KW SL CCB contributed critical revisions to the draft for important intellectual content. All authors reviewed and approved of the final version submitted for publication and agree to be accountable for all aspects of the work in ensuring that questions related to accuracy and integrity are appropriately investigated and resolved.

## References

1. O'Neill J. Antimicrobial Resistance : Tackling a crisis for the health and wealth of nations. *Rev Antimicrob Resist.* 2014;(December):1-16. doi:10.1038/510015a.
2. Centres for Disease Control and Prevention. *Antibiotic Resistance Threats in the United States, 2013.* Atlanta; 2013. <http://www.cdc.gov/drugresistance/threat-report-2013/>.
3. Shehab N, Patel PR, Srinivasan A, Budnitz DS. Emergency department visits for antibiotic-associated adverse events. *Clin Infect Dis.* 2008;47(6):735-743. doi:10.1086/591126.
4. Hersh AL, Shapiro DJ, Pavia AT, Shah SS. Antibiotic prescribing in ambulatory pediatrics in the United States. *Pediatrics.* 2011;128(6):1053-1061. doi:10.1542/peds.2011-1337.
5. Kronman MP, Zhou C, Mangione-Smith R. Bacterial prevalence and antimicrobial prescribing trends for acute respiratory tract infections. *Pediatrics.* 2014;134(4):e956-65. doi:10.1542/peds.2014-0605.
6. Nyquist AC, Gonzales R, Steiner JF, Sande MA. Antibiotic prescribing for children with colds, upper respiratory tract infections, and bronchitis. *Jama.* 1998;279(11):875-877. doi:10.1001/jama.279.11.875.
7. Vaz LE, Kleinman KP, Raebel MA, et al. Recent trends in outpatient antibiotic use in children. *Pediatrics.* 2014;133(3):375-385. doi:10.1542/peds.2013-2903.
8. Finkelstein JA, Dutta-Linn M, Meyer R, Goldman R. Childhood infections, antibiotics, and resistance: what are parents saying now? *Clin Pediatr (Phila).* 2014;53(2):145-150. doi:10.1177/0009922813505902.
9. Havens L, Schwartz M. Identification of Parents Perceptions of Antibiotic Use for Individualized Community Education. *Glob Pediatr Heal.* 2016;3(0). doi:10.1177/2333794X16654067.
10. Cabral C, Horwood J, Hay AD, Lucas PJ. How communication affects prescription decisions in consultations for acute illness in children: a systematic review and meta-ethnography. *BMC Fam Pract.* 2014;15(1):63. doi:10.1186/1471-2296-15-63.
11. Cabral C, Ingram J, Lucas PJ, et al. Influence of Clinical Communication on Parents' Antibiotic Expectations for Children With Respiratory Tract Infections. *Ann Fam Med.* 2016;14(2):141-147. doi:10.1370/afm.1892.
12. Szymczak JE, Feemster KA, Zaoutis TE, Gerber JS. Pediatrician Perceptions of an Outpatient Antimicrobial Stewardship Intervention. *Infect Control Hosp Epidemiol.* 2014;35(S3):S69-S78. doi:10.1086/677826.
13. Tonkin-Crine S, Yardley L, Little P. Antibiotic prescribing for acute respiratory tract infections in primary care: a systematic review and meta-ethnography. *J Antimicrob Chemother.* 2011;66(10):2215-2223. doi:10.1093/jac/dkr279.
14. Cho H-J, Hong S-J, Park S. Knowledge and beliefs of primary care physicians, pharmacists, and parents on antibiotic use for the pediatric common cold. *Soc Sci Med.* 2004;58(3):623-629. doi:10.1016/S0277-9536(03)00231-4.
15. Vinson DC, Lutz LJ. The effect of parental expectations on treatment of children with a cough: a report from ASPN. *J Fam Pract.* 1993;37:23-27.
16. Mangione-Smith R, McGlynn EA, Elliott MN, Krogstad P, Brook RH. The relationship between perceived parental expectations and pediatrician antimicrobial prescribing behavior. *Pediatrics.* 1999;103(4):711-718. doi:10.1542/peds.103.4.711.
17. Mangione-Smith R, McGlynn EA, Elliott MN, McDonald L, Franz CE, Kravitz RL. Parent expectations for antibiotics, physician-parent communication, and satisfaction. *Arch Pediatr Adolesc Med.* 2001;155(July 2001):800-806. doi:10.1001/archpedi.155.7.800.



## Interventions to reduce antibiotic misuse 22

18. Mangione-Smith R, Zhou C, Robinson JD, Taylor JA, Elliott MN, Heritage J. Communication practices and antibiotic use for acute respiratory tract infections in children. *Ann Fam Med*. 2015;13(3):221-227. doi:10.1370/afm.1785.
19. Andrews T, Thompson M, Buckley DI, et al. Interventions to influence consulting and antibiotic use for acute respiratory tract infections in children: A systematic review and Meta-Analysis. *PLoS One*. 2012;7(1). doi:10.1371/journal.pone.0030334.
20. Hu Y, Walley J, Chou R, et al. Interventions to reduce childhood antibiotic prescribing for upper respiratory infections: systematic review and meta-analysis. *J Epidemiol Community Health*. 2016;jech-2015-206543. doi:10.1136/jech-2015-206543.
21. Francis NA, Phillips R, Wood F, Hood K, Simpson S, Butler CC. Parents' and clinicians' views of an interactive booklet about respiratory tract infections in children: a qualitative process evaluation of the EQUIP randomised controlled trial. *BMC Fam Pract*. 2013;14(1):182. doi:10.1186/1471-2296-14-182.
22. Grijalva CG, Nuorti JP, Griffin MR. Antibiotic Prescription Rates for Acute Respiratory Tract Infections in US Ambulatory Settings. *JAMA*. 2009;302(7):758. doi:10.1001/jama.2009.1163.
23. Francis NA, Butler CC, Hood K, Simpson S, Wood F, Nuttall J. Effect of using an interactive booklet about childhood respiratory tract infections in primary care consultations on reconsulting and antibiotic prescribing: a cluster randomised controlled trial. *BMJ*. 2009;339:b2885. doi:10.1136/bmj.b2885.
24. Feudtner C, Feinstein JA, Zhong W, Hall M, Dai D. Pediatric complex chronic conditions classification system version 2: updated for ICD-10 and complex medical technology dependence and transplantation. *BMC Pediatr*. 2014;14(1):199. doi:10.1186/1471-2431-14-199.
25. Francis NA, Hood K, Simpson S, Wood F, Nuttall J, Butler CC. The effect of using an interactive booklet on childhood respiratory tract infections in consultations: Study protocol for a cluster randomised controlled trial in primary care. *BMC Fam Pract*. 2008;9(1):23. doi:10.1186/1471-2296-9-23.
26. Cals JW, Scheppers NAM, Hopstaken RM, et al. Evidence based management of acute bronchitis; sustained competence of enhanced communication skills acquisition in general practice. *Patient Educ Couns*. 2007;68(3):270-278. doi:10.1016/j.pec.2007.06.014.
27. Cals JW, Butler CC, Hopstaken RM, Hood K, Dinant GJ. Effect of point of care testing for C reactive protein and training in communication skills on antibiotic use in lower respiratory tract infections: cluster randomised trial. *BMJ*. 2009;338:b1374-b1374. doi:10.1136/bmj.b1374.
28. Butler CC, Simpson SA, Dunstan F, et al. Effectiveness of multifaceted educational programme to reduce antibiotic dispensing in primary care: practice based randomised controlled trial. *BMJ*. 2012;344:d8173-d8173. doi:10.1136/bmj.d8173.
29. Bekkers M-J, Simpson SA, Dunstan F, et al. Enhancing the quality of antibiotic prescribing in Primary Care: Qualitative evaluation of a blended learning intervention. *BMC Fam Pract*. 2010;11(1):34. doi:10.1186/1471-2296-11-34.
30. Little P, Stuart B, Francis N, et al. Effects of internet-based training on antibiotic prescribing rates for acute respiratory-tract infections: A multinational, cluster, randomised, factorial, controlled trial. *Lancet*. 2013;382(9899):1175-1182. doi:10.1016/S0140-6736(13)60994-0.
31. Matjasko JL, Cawley JH, Baker-Goering MM, Yokum D V. Applying Behavioral Economics to Public Health Policy: Illustrative Examples and Promising Directions. *Am J Prev Med*. 2016;50(5):S13-S19. doi:10.1016/j.amepre.2016.02.007.
32. Catley D, Harris KJ, Goggin K, et al. Motivational Interviewing for encouraging quit attempts among unmotivated smokers: study protocol of a randomized, controlled, efficacy trial. *BMC Public Health*. 2012;12(1):456. doi:10.1186/1471-2458-12-456.
33. Goggin K, Gerkovich MM, Williams KB, et al. A randomized controlled trial examining the



- 1  
2  
3 efficacy of motivational counseling with observed therapy for antiretroviral therapy  
4 adherence. *AIDS Behav.* 2013;17(6):1992-2001. doi:10.1007/s10461-013-0467-3.
- 5  
6 34. Ranji SR, Steinman MA, Shojania KG, Gonzales R. Interventions to reduce unnecessary  
7 antibiotic prescribing: a systematic review and quantitative analysis. *Med Care.*  
8 2008;46(8):847-862. doi:10.1097/MLR.0b013e318178eabd.
- 9  
10 35. Bartels RD, Kelly KM, Rothman AJ. Moving beyond the function of the health behaviour: The  
11 effect of message frame on behavioural decision-making. *Psychol Heal.* 2010;25(7):821-838.  
12 doi:10.1080/08870440902893708.
- 13  
14 36. Van Der Velden AW, Pijpers EJ, Kuyvenhoven MM, Tonkin-Crine SKG, Little P, Verheij TJM.  
15 Effectiveness of physician-targeted interventions to improve antibiotic use for respiratory  
16 tract infections. *Br J Gen Pract.* 2012;62(605). doi:10.3399/bjgp12X659268.
- 17  
18 37. Maor Y, Raz M, Rubinstein E, et al. Changing parents' opinions regarding antibiotic use in  
19 primary care. *Eur J Pediatr.* 2011;170(3):359-364. doi:10.1007/s00431-010-1301-9.
- 20  
21 38. Schnellinger M, Finkelstein M, Thygeson M V, Vander Velden H, Karpas A, Madhok M.  
22 Animated video vs pamphlet: comparing the success of educating parents about proper  
23 antibiotic use. *Pediatrics.* 2010;125(5):990-996. doi:10.1542/peds.2009-2916.
- 24  
25 39. Taylor JA, Kwan-Gett TSC, McMahon Jr EM. Effectiveness of a parental educational  
26 intervention in reducing antibiotic use in children: A randomized controlled trial. *Pediatr  
27 Infect Dis J.* 2005;24(6):489-493.  
28 doi:http://dx.doi.org/10.1097/01.inf.0000164706.91337.5d.
- 29  
30 40. González OE, Armas PL, Bravo GJ, Cabrales EJ, Corrales RR, Abreu SG. Prescription of  
31 antibiotics for mild acute respiratory infections in children. *Bull Pan Am Health Organ.*  
32 1996;30(2):106-117.
- 33  
34 41. Hennessy TW, Petersen KM, Bruden D, et al. Changes in Antibiotic-Prescribing Practices and  
35 Carriage of Penicillin-Resistant *Streptococcus pneumoniae*: A Controlled Intervention Trial  
36 in Rural Alaska. *Clin Infect Dis.* 2002;34(12):1543-1550. doi:10.1086/340534.
- 37  
38 42. Hingorani R, Mahmood M, Alweis R. Improving antibiotic adherence in treatment of acute  
39 upper respiratory infections: a quality improvement process. *J community Hosp Intern Med  
40 Perspect.* 2015;5(3):27472. doi:10.3402/jchimp.v5.27472.
- 41  
42 43. Juzych NS, Banerjee M, Essenmacher L, Lerner SA. Improvements in antimicrobial  
43 prescribing for treatment of upper respiratory tract infections through provider education. *J  
44 Gen Intern Med.* 2005;20(10):901-905. doi:10.1111/j.1525-1497.2005.0198.x.
- 45  
46 44. Smeets HM, De Wit NJ, Delnoij DMJ, Hoes AW. Patient attitudes towards and experiences  
47 with an intervention programme to reduce chronic acid-suppressing drug intake in primary  
48 care. *Eur J Gen Pract.* 2009;15(4):219-225. doi:10.3109/13814780903452168.
- 49  
50 45. Scholl I, Koelewijn-van Loon M, Sepucha K, et al. Measurement of shared decision making - A  
51 review of instruments. *Z Evid Fortbild Qual Gesundheitswes.* 2011;105(4):313-324.  
52 doi:10.1016/j.zefq.2011.04.012.
- 53  
54 46. Gerber JS, Prasad PA, Fiks AG, et al. Effect of an Outpatient Antimicrobial Stewardship  
55 Intervention on Broad-Spectrum Antibiotic Prescribing by Primary Care Pediatricians. *JAMA.*  
56 2013;309(22):2345. doi:10.1001/jama.2013.6287.
- 57  
58 47. Meeker D, Linder JA, Fox CR, et al. Effect of Behavioral Interventions on Inappropriate  
59 Antibiotic Prescribing Among Primary Care Practices: A Randomized Clinical Trial. *J Am Med  
60 Assoc.* 2016;315(6):562-570. doi:10.1001/jama.2016.0275.
- 61  
62 48. Finkelstein JA, Davis RL, Dowell SF, et al. Reducing antibiotic use in children: a randomized  
63 trial in 12 practices. *Pediatrics.* 2001;108(1):1-7. doi:10.1542/peds.108.1.1.
- 64  
65 49. Elwyn G, Barr PJ, Grande SW, Thompson R, Walsh T, Ozanne EM. Developing CollaboRATE: A  
66 fast and frugal patient-reported measure of shared decision making in clinical encounters.  
67 *Patient Educ Couns.* 2013;93(1):102-107. doi:10.1016/j.pec.2013.05.009.
- 68  
69 50. Barr PJ, Elwyn G. Measurement challenges in shared decision making: putting the "patient" in

## Interventions to reduce antibiotic misuse 24

- 1  
2  
3 patient-reported measures. *Heal Expect*. 2016;19(5):993-1001. doi:10.1111/hex.12380.  
4 51. Barr PJ, Thompson R, Walsh T, Grande SW, Ozanne EM, Elwyn G. The psychometric  
5 properties of collaborate: A fast and frugal patient-reported measure of the shared decision-  
6 making process. *J Med Internet Res*. 2014;16(1):1-19. doi:10.2196/jmir.3085.  
7 52. StataCorp. Stata Statistical Software: Release 14. 2015. 2015.  
8  
9  
10  
11  
12  
13  
14  
15  
16  
17  
18  
19  
20  
21  
22  
23  
24  
25  
26  
27  
28  
29  
30  
31  
32  
33  
34  
35  
36  
37  
38  
39  
40  
41  
42  
43  
44  
45  
46  
47  
48  
49  
50  
51  
52  
53  
54  
55  
56  
57  
58  
59  
60

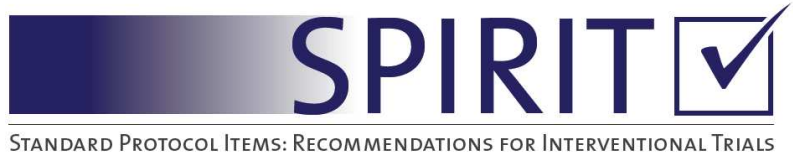

1  
2  
3  
4  
5  
6  
7  
8  
9  
10  
11  
12  
13  
14  
15  
16  
17  
18  
19  
20  
21  
22  
23  
24  
25  
26  
27  
28  
29  
30  
31  
32  
33  
34  
35  
36  
37  
38  
39  
40  
41  
42  
43  
44  
45  
46  
47

SPIRIT 2013 Checklist: Recommended items to address in a clinical trial protocol and related documents\*

| Section/item                      | Item No | Description                                                                                                                                                                                                                                                                              | Addressed on page number                          |
|-----------------------------------|---------|------------------------------------------------------------------------------------------------------------------------------------------------------------------------------------------------------------------------------------------------------------------------------------------|---------------------------------------------------|
| <b>Administrative information</b> |         |                                                                                                                                                                                                                                                                                          |                                                   |
| Title                             | 1       | Descriptive title identifying the study design, population, interventions, and, if applicable, trial acronym                                                                                                                                                                             | __1__                                             |
| Trial registration                | 2a      | Trial identifier and registry name. If not yet registered, name of intended registry                                                                                                                                                                                                     | __3__                                             |
|                                   | 2b      | All items from the World Health Organization Trial Registration Data Set                                                                                                                                                                                                                 | <u>throughout document and NCT trial registry</u> |
| Protocol version                  | 3       | Date and version identifier                                                                                                                                                                                                                                                              | __1__                                             |
| Funding                           | 4       | Sources and types of financial, material, and other support                                                                                                                                                                                                                              | __20__                                            |
| Roles and responsibilities        | 5a      | Names, affiliations, and roles of protocol contributors                                                                                                                                                                                                                                  | __1__                                             |
|                                   | 5b      | Name and contact information for the trial sponsor                                                                                                                                                                                                                                       | __20__                                            |
|                                   | 5c      | Role of study sponsor and funders, if any, in study design; collection, management, analysis, and interpretation of data; writing of the report; and the decision to submit the report for publication, including whether they will have ultimate authority over any of these activities | <u>None (see acknowledgements, p. 20)</u>         |

|    |    |                                                                                                                                                                                                                                                                  |         |
|----|----|------------------------------------------------------------------------------------------------------------------------------------------------------------------------------------------------------------------------------------------------------------------|---------|
| 1  |    |                                                                                                                                                                                                                                                                  |         |
| 2  |    |                                                                                                                                                                                                                                                                  |         |
| 3  | 5d | Composition, roles, and responsibilities of the coordinating centre, steering committee, endpoint adjudication committee, data management team, and other individuals or groups overseeing the trial, if applicable (see Item 21a for data monitoring committee) | __N/A__ |
| 4  |    |                                                                                                                                                                                                                                                                  |         |
| 5  |    |                                                                                                                                                                                                                                                                  |         |
| 6  |    |                                                                                                                                                                                                                                                                  |         |
| 7  |    |                                                                                                                                                                                                                                                                  |         |
| 8  |    |                                                                                                                                                                                                                                                                  |         |
| 9  |    |                                                                                                                                                                                                                                                                  |         |
| 10 |    |                                                                                                                                                                                                                                                                  |         |

## Introduction

|    |                          |    |                                                                                                                                                                                                           |         |
|----|--------------------------|----|-----------------------------------------------------------------------------------------------------------------------------------------------------------------------------------------------------------|---------|
| 11 |                          |    |                                                                                                                                                                                                           |         |
| 12 |                          |    |                                                                                                                                                                                                           |         |
| 13 | Background and rationale | 6a | Description of research question and justification for undertaking the trial, including summary of relevant studies (published and unpublished) examining benefits and harms for each intervention        | __5-7__ |
| 14 |                          |    |                                                                                                                                                                                                           |         |
| 15 |                          |    |                                                                                                                                                                                                           |         |
| 16 |                          | 6b | Explanation for choice of comparators                                                                                                                                                                     | __6-7__ |
| 17 | Objectives               | 7  | Specific objectives or hypotheses                                                                                                                                                                         | __7__   |
| 18 |                          |    |                                                                                                                                                                                                           |         |
| 19 | Trial design             | 8  | Description of trial design including type of trial (eg, parallel group, crossover, factorial, single group), allocation ratio, and framework (eg, superiority, equivalence, noninferiority, exploratory) | __7__   |
| 20 |                          |    |                                                                                                                                                                                                           |         |
| 21 |                          |    |                                                                                                                                                                                                           |         |
| 22 |                          |    |                                                                                                                                                                                                           |         |

## Methods: Participants, interventions, and outcomes

|    |                      |     |                                                                                                                                                                                                |           |
|----|----------------------|-----|------------------------------------------------------------------------------------------------------------------------------------------------------------------------------------------------|-----------|
| 23 |                      |     |                                                                                                                                                                                                |           |
| 24 |                      |     |                                                                                                                                                                                                |           |
| 25 | Study setting        | 9   | Description of study settings (eg, community clinic, academic hospital) and list of countries where data will be collected. Reference to where list of study sites can be obtained             | __8-9__   |
| 26 |                      |     |                                                                                                                                                                                                |           |
| 27 |                      |     |                                                                                                                                                                                                |           |
| 28 | Eligibility criteria | 10  | Inclusion and exclusion criteria for participants. If applicable, eligibility criteria for study centres and individuals who will perform the interventions (eg, surgeons, psychotherapists)   | __9-10__  |
| 29 |                      |     |                                                                                                                                                                                                |           |
| 30 |                      |     |                                                                                                                                                                                                |           |
| 31 | Interventions        | 11a | Interventions for each group with sufficient detail to allow replication, including how and when they will be administered                                                                     | __10-13__ |
| 32 |                      |     |                                                                                                                                                                                                |           |
| 33 |                      |     |                                                                                                                                                                                                |           |
| 34 |                      | 11b | Criteria for discontinuing or modifying allocated interventions for a given trial participant (eg, drug dose change in response to harms, participant request, or improving/worsening disease) | __9__     |
| 35 |                      |     |                                                                                                                                                                                                |           |
| 36 |                      |     |                                                                                                                                                                                                |           |
| 37 |                      | 11c | Strategies to improve adherence to intervention protocols, and any procedures for monitoring adherence (eg, drug tablet return, laboratory tests)                                              | __11-12__ |
| 38 |                      |     |                                                                                                                                                                                                |           |
| 39 |                      |     |                                                                                                                                                                                                |           |
| 40 |                      | 11d | Relevant concomitant care and interventions that are permitted or prohibited during the trial                                                                                                  | __9-10__  |
| 41 |                      |     |                                                                                                                                                                                                |           |
| 42 |                      |     |                                                                                                                                                                                                |           |
| 43 |                      |     |                                                                                                                                                                                                |           |
| 44 |                      |     |                                                                                                                                                                                                |           |
| 45 |                      |     |                                                                                                                                                                                                |           |
| 46 |                      |     |                                                                                                                                                                                                |           |
| 47 |                      |     |                                                                                                                                                                                                |           |

1  
2  
3  
4  
5  
6  
7  
8  
9  
10  
11  
12  
13  
14  
15  
16  
17  
18  
19  
20  
21  
22  
23  
24  
25  
26  
27  
28  
29  
30  
31  
32  
33  
34  
35  
36  
37  
38  
39  
40  
41  
42  
43  
44  
45  
46  
47

|                      |    |                                                                                                                                                                                                                                                                                                                                                                                |              |
|----------------------|----|--------------------------------------------------------------------------------------------------------------------------------------------------------------------------------------------------------------------------------------------------------------------------------------------------------------------------------------------------------------------------------|--------------|
| Outcomes             | 12 | Primary, secondary, and other outcomes, including the specific measurement variable (eg, systolic blood pressure), analysis metric (eg, change from baseline, final value, time to event), method of aggregation (eg, median, proportion), and time point for each outcome. Explanation of the clinical relevance of chosen efficacy and harm outcomes is strongly recommended | __14-17__    |
| Participant timeline | 13 | Time schedule of enrolment, interventions (including any run-ins and washouts), assessments, and visits for participants. A schematic diagram is highly recommended (see Figure)                                                                                                                                                                                               | __13-14__    |
| Sample size          | 14 | Estimated number of participants needed to achieve study objectives and how it was determined, including clinical and statistical assumptions supporting any sample size calculations                                                                                                                                                                                          | __17__       |
| Recruitment          | 15 | Strategies for achieving adequate participant enrolment to reach target sample size                                                                                                                                                                                                                                                                                            | __9-10, 14__ |

**Methods: Assignment of interventions (for controlled trials)**

Allocation:

|                                  |     |                                                                                                                                                                                                                                                                                                                                                          |             |
|----------------------------------|-----|----------------------------------------------------------------------------------------------------------------------------------------------------------------------------------------------------------------------------------------------------------------------------------------------------------------------------------------------------------|-------------|
| Sequence generation              | 16a | Method of generating the allocation sequence (eg, computer-generated random numbers), and list of any factors for stratification. To reduce predictability of a random sequence, details of any planned restriction (eg, blocking) should be provided in a separate document that is unavailable to those who enrol participants or assign interventions | __8__       |
| Allocation concealment mechanism | 16b | Mechanism of implementing the allocation sequence (eg, central telephone; sequentially numbered, opaque, sealed envelopes), describing any steps to conceal the sequence until interventions are assigned                                                                                                                                                | __8__       |
| Implementation                   | 16c | Who will generate the allocation sequence, who will enrol participants, and who will assign participants to interventions                                                                                                                                                                                                                                | __8__       |
| Blinding (masking)               | 17a | Who will be blinded after assignment to interventions (eg, trial participants, care providers, outcome assessors, data analysts), and how                                                                                                                                                                                                                | __8,14,15__ |
|                                  | 17b | If blinded, circumstances under which unblinding is permissible, and procedure for revealing a participant's allocated intervention during the trial                                                                                                                                                                                                     | __N/A__     |

**Methods: Data collection, management, and analysis**

|    |                                 |     |                                                                                                               |              |
|----|---------------------------------|-----|---------------------------------------------------------------------------------------------------------------|--------------|
| 1  |                                 |     |                                                                                                               |              |
| 2  |                                 |     |                                                                                                               |              |
| 3  | Data collection                 | 18a | Plans for assessment and collection of outcome, baseline, and other trial data, including any related         | _13-17_____  |
| 4  | methods                         |     | processes to promote data quality (eg, duplicate measurements, training of assessors) and a description of    |              |
| 5  |                                 |     | study instruments (eg, questionnaires, laboratory tests) along with their reliability and validity, if known. |              |
| 6  |                                 |     | Reference to where data collection forms can be found, if not in the protocol                                 |              |
| 7  |                                 |     |                                                                                                               |              |
| 8  |                                 | 18b | Plans to promote participant retention and complete follow-up, including list of any outcome data to be       | _13-16_____  |
| 9  |                                 |     | collected for participants who discontinue or deviate from intervention protocols                             |              |
| 10 |                                 |     |                                                                                                               |              |
| 11 | Data management                 | 19  | Plans for data entry, coding, security, and storage, including any related processes to promote data quality  | _13, 17_____ |
| 12 |                                 |     | (eg, double data entry; range checks for data values). Reference to where details of data management          |              |
| 13 |                                 |     | procedures can be found, if not in the protocol                                                               |              |
| 14 |                                 |     |                                                                                                               |              |
| 15 | Statistical methods             | 20a | Statistical methods for analysing primary and secondary outcomes. Reference to where other details of the     | _17-18_____  |
| 16 |                                 |     | statistical analysis plan can be found, if not in the protocol                                                |              |
| 17 |                                 |     |                                                                                                               |              |
| 18 |                                 | 20b | Methods for any additional analyses (eg, subgroup and adjusted analyses)                                      | _18_____     |
| 19 |                                 |     |                                                                                                               |              |
| 20 |                                 | 20c | Definition of analysis population relating to protocol non-adherence (eg, as randomised analysis), and any    |              |
| 21 |                                 |     | statistical methods to handle missing data (eg, multiple imputation)                                          | _17_____     |
| 22 |                                 |     |                                                                                                               |              |
| 23 |                                 |     |                                                                                                               |              |
| 24 | <b>Methods: Monitoring</b>      |     |                                                                                                               |              |
| 25 | Data monitoring                 | 21a | Composition of data monitoring committee (DMC); summary of its role and reporting structure; statement of     | _8_____      |
| 26 |                                 |     | whether it is independent from the sponsor and competing interests; and reference to where further details    |              |
| 27 |                                 |     | about its charter can be found, if not in the protocol. Alternatively, an explanation of why a DMC is not     |              |
| 28 |                                 |     | needed                                                                                                        |              |
| 29 |                                 |     |                                                                                                               |              |
| 30 |                                 |     |                                                                                                               |              |
| 31 |                                 | 21b | Description of any interim analyses and stopping guidelines, including who will have access to these interim  | _8_____      |
| 32 |                                 |     | results and make the final decision to terminate the trial                                                    |              |
| 33 |                                 |     |                                                                                                               |              |
| 34 | Harms                           | 22  | Plans for collecting, assessing, reporting, and managing solicited and spontaneously reported adverse         | _8_____      |
| 35 |                                 |     | events and other unintended effects of trial interventions or trial conduct                                   |              |
| 36 |                                 |     |                                                                                                               |              |
| 37 | Auditing                        | 23  | Frequency and procedures for auditing trial conduct, if any, and whether the process will be independent      | _8_____      |
| 38 |                                 |     | from investigators and the sponsor                                                                            |              |
| 39 |                                 |     |                                                                                                               |              |
| 40 |                                 |     |                                                                                                               |              |
| 41 | <b>Ethics and dissemination</b> |     |                                                                                                               |              |
| 42 |                                 |     |                                                                                                               |              |
| 43 |                                 |     |                                                                                                               |              |
| 44 |                                 |     |                                                                                                               |              |
| 45 |                                 |     |                                                                                                               |              |
| 46 |                                 |     |                                                                                                               |              |
| 47 |                                 |     |                                                                                                               |              |

1  
2  
3 Research ethics 24 Plans for seeking research ethics committee/institutional review board (REC/IRB) approval 8  
4 approval  
5  
6 Protocol 25 Plans for communicating important protocol modifications (eg, changes to eligibility criteria, outcomes, 8  
7 amendments analyses) to relevant parties (eg, investigators, REC/IRBs, trial participants, trial registries, journals, 8  
8 regulators)  
9  
10 Consent or assent 26a Who will obtain informed consent or assent from potential trial participants or authorised surrogates, and 8-10  
11 how (see Item 32)  
12  
13 26b Additional consent provisions for collection and use of participant data and biological specimens in ancillary N/A  
14 studies, if applicable  
15  
16 Confidentiality 27 How personal information about potential and enrolled participants will be collected, shared, and maintained 9-10  
17 in order to protect confidentiality before, during, and after the trial  
18  
19 Declaration of 28 Financial and other competing interests for principal investigators for the overall trial and each study site 20  
20 interests  
21  
22 Access to data 29 Statement of who will have access to the final trial dataset, and disclosure of contractual agreements that N/A  
23 limit such access for investigators  
24  
25 Ancillary and post- 30 Provisions, if any, for ancillary and post-trial care, and for compensation to those who suffer harm from trial N/A  
26 trial care participation  
27  
28 Dissemination policy 31a Plans for investigators and sponsor to communicate trial results to participants, healthcare professionals, 2  
29 the public, and other relevant groups (eg, via publication, reporting in results databases, or other data  
30 sharing arrangements), including any publication restrictions  
31  
32 31b Authorship eligibility guidelines and any intended use of professional writers Authorship  
33 contributions  
34 detailed in BMJ  
35 submission system  
36  
37 31c Plans, if any, for granting public access to the full protocol, participant-level dataset, and statistical code N/A  
38  
39

40 **Appendices**

|   |                  |    |                                                                                                           |                |
|---|------------------|----|-----------------------------------------------------------------------------------------------------------|----------------|
| 1 |                  |    |                                                                                                           |                |
| 2 |                  |    |                                                                                                           |                |
| 3 | Informed consent | 32 | Model consent form and other related documentation given to participants and authorised surrogates        | <u>  N/A  </u> |
| 4 | materials        |    |                                                                                                           |                |
| 5 |                  |    |                                                                                                           |                |
| 6 | Biological       | 33 | Plans for collection, laboratory evaluation, and storage of biological specimens for genetic or molecular | <u>  N/A  </u> |
| 7 | specimens        |    | analysis in the current trial and for future use in ancillary studies, if applicable                      |                |
| 8 | <hr/>            |    |                                                                                                           |                |

9 \*It is strongly recommended that this checklist be read in conjunction with the SPIRIT 2013 Explanation & Elaboration for important clarification on the items.  
10 Amendments to the protocol should be tracked and dated. The SPIRIT checklist is copyrighted by the SPIRIT Group under the Creative Commons  
11 "[Attribution-NonCommercial-NoDerivs 3.0 Unported](#)" license.  
12  
13  
14  
15  
16  
17  
18  
19  
20  
21  
22  
23  
24  
25  
26  
27  
28  
29  
30  
31  
32  
33  
34  
35  
36  
37  
38  
39  
40  
41  
42  
43  
44  
45  
46  
47



# BMJ Open

## Protocol for a randomized trial of higher versus lower intensity patient-provider communication interventions to reduce antibiotic misuse in two pediatric ambulatory clinics in the United States

|                                 |                                                                                                                                                                                                                                                                                                                                                                                                                                                                                                                                                                                                                                                                                                                                                                                                                                                                                                                                                                                                                                                                                                                                                                                                                                                                                                                                                                                             |
|---------------------------------|---------------------------------------------------------------------------------------------------------------------------------------------------------------------------------------------------------------------------------------------------------------------------------------------------------------------------------------------------------------------------------------------------------------------------------------------------------------------------------------------------------------------------------------------------------------------------------------------------------------------------------------------------------------------------------------------------------------------------------------------------------------------------------------------------------------------------------------------------------------------------------------------------------------------------------------------------------------------------------------------------------------------------------------------------------------------------------------------------------------------------------------------------------------------------------------------------------------------------------------------------------------------------------------------------------------------------------------------------------------------------------------------|
| Journal:                        | <i>BMJ Open</i>                                                                                                                                                                                                                                                                                                                                                                                                                                                                                                                                                                                                                                                                                                                                                                                                                                                                                                                                                                                                                                                                                                                                                                                                                                                                                                                                                                             |
| Manuscript ID                   | bmjopen-2017-020981.R1                                                                                                                                                                                                                                                                                                                                                                                                                                                                                                                                                                                                                                                                                                                                                                                                                                                                                                                                                                                                                                                                                                                                                                                                                                                                                                                                                                      |
| Article Type:                   | Protocol                                                                                                                                                                                                                                                                                                                                                                                                                                                                                                                                                                                                                                                                                                                                                                                                                                                                                                                                                                                                                                                                                                                                                                                                                                                                                                                                                                                    |
| Date Submitted by the Author:   | 22-Feb-2018                                                                                                                                                                                                                                                                                                                                                                                                                                                                                                                                                                                                                                                                                                                                                                                                                                                                                                                                                                                                                                                                                                                                                                                                                                                                                                                                                                                 |
| Complete List of Authors:       | Goggin, Kathy; Children's Mercy Hospitals and Clinics, Health Services and Outcomes Research; University of Missouri Kansas City School of Medicine<br>Bradley-Ewing, Andrea; Children's Mercy Hospitals and Clinics, Health Services and Outcomes Research<br>Myers, Angela; University of Missouri Kansas City School of Medicine; Children's Mercy Hospitals and Clinics, Infectious Diseases<br>Lee, Brian; Children's Mercy Hospitals and Clinics, Health Services and Outcomes Research; University of Missouri Kansas City School of Medicine<br>Hurley, Emily; Children's Mercy Hospitals and Clinics, Health Services and Outcomes Research<br>Delay, Kirsten; Children's Mercy Hospitals and Clinics, Health Services and Outcomes Research<br>Schlachter, Sarah; Children's Mercy Hospitals and Clinics, Health Services and Outcomes Research<br>Ramphal, Areli; Children's Mercy Hospitals and Clinics, Health Services and Outcomes Research<br>Pina, Kimberly; Children's Mercy Hospitals and Clinics, Health Services and Outcomes Research<br>Yu, David; Sunflower Medical Group<br>Weltmer, Kirsten; University of Missouri Kansas City School of Medicine<br>Linnemayr, Sebastian ; Rand Corporation<br>Butler, C; University of Oxford, Nuffield Department of Primary Care Health Sciences<br>Newland, JG; St. Louis Children's Hospital, Pediatric Infectious Disease |
| <b>Primary Subject Heading</b>: | Communication                                                                                                                                                                                                                                                                                                                                                                                                                                                                                                                                                                                                                                                                                                                                                                                                                                                                                                                                                                                                                                                                                                                                                                                                                                                                                                                                                                               |
| Secondary Subject Heading:      | Public health, Patient-centred medicine, Paediatrics, Evidence based practice, Infectious diseases                                                                                                                                                                                                                                                                                                                                                                                                                                                                                                                                                                                                                                                                                                                                                                                                                                                                                                                                                                                                                                                                                                                                                                                                                                                                                          |
| Keywords:                       | Quality in health care < HEALTH SERVICES ADMINISTRATION & MANAGEMENT, PAEDIATRICS, PRIMARY CARE, PUBLIC HEALTH                                                                                                                                                                                                                                                                                                                                                                                                                                                                                                                                                                                                                                                                                                                                                                                                                                                                                                                                                                                                                                                                                                                                                                                                                                                                              |
|                                 |                                                                                                                                                                                                                                                                                                                                                                                                                                                                                                                                                                                                                                                                                                                                                                                                                                                                                                                                                                                                                                                                                                                                                                                                                                                                                                                                                                                             |

1  
2  
3  
4  
5  
6  
7  
8  
9  
10  
11  
12  
13  
14  
15  
16  
17  
18  
19  
20  
21  
22  
23  
24  
25  
26  
27  
28  
29  
30  
31  
32  
33  
34  
35  
36  
37  
38  
39  
40  
41  
42  
43  
44  
45  
46  
47  
48  
49  
50  
51  
52  
53  
54  
55  
56  
57  
58  
59  
60

SCHOLARONE™  
Manuscripts

For peer review only

1  
2  
3  
4  
5  
6  
7 Protocol for a randomized trial of higher versus lower intensity patient-provider  
8 communication interventions to reduce antibiotic misuse in two pediatric ambulatory  
9  
10  
11  
12 clinics in the United States  
13  
14  
15  
16  
17  
18  
19

20  
21 Kathy Goggin<sup>1,2,3,§</sup>, Andrea Bradley-Ewing<sup>1</sup>, Angela L. Myers<sup>2,4</sup>, Brian R. Lee<sup>1,2</sup>, Emily A.  
22 Hurley<sup>1</sup>, Kirsten B. Delay<sup>1</sup>, Sarah Schlachter<sup>1</sup>, Areli Ramphal<sup>1</sup>, Kimberly Pina<sup>1</sup>, David Yu<sup>5</sup>,  
23 Kirsten Weltmer<sup>2</sup>, Sebastian Linnemayr<sup>6</sup>, Christopher C. Butler<sup>7</sup>, & Jason G. Newland<sup>8</sup>  
24  
25  
26  
27  
28

29 <sup>1</sup>Health Services and Outcomes Research, Children's Mercy Hospitals and Clinics, Kansas City  
30

31 <sup>2</sup>University of Missouri – Kansas City School of Medicine, Kansas City  
32

33 <sup>3</sup>University of Missouri – Kansas City School of Pharmacy, Kansas City  
34

35 <sup>4</sup>Infectious Diseases, Children's Mercy, Kansas City  
36

37 <sup>5</sup>Sunflower Medical Group, Kansas City  
38

39 <sup>6</sup>RAND Corporation, Santa Monica  
40

41 <sup>7</sup>Nuffield Department of Primary Care Health Sciences, University of Oxford  
42

43 <sup>8</sup>Pediatric Infectious Disease, St. Louis Children's Hospital, St. Louis  
44  
45  
46  
47

48 **§Corresponding Author:** Kathy Goggin, Children's Mercy Hospital Kansas City and University  
49 of Missouri - Kansas City, 2401 Gillham Road, Kansas City, MO 64108, +1 816 701-4481,  
50 [kgoggin@cmh.edu](mailto:kgoggin@cmh.edu)  
51  
52  
53  
54

55 Submitted December 5, 2017 (Version 1)  
56  
57  
58  
59  
60

## Abstract

**Introduction:** Children with acute respiratory tract infections (ARTIs) are prescribed up to 11.4 million unnecessary antibiotic prescriptions annually. Inadequate parent-provider communication is a chief contributor, yet efforts to reduce overprescribing have only indirectly targeted communication or been impractical. This paper describes our multi-site, parallel group, cluster randomized trial comparing two feasible interventions for enhancing parent-provider communication on the rate of inappropriate antibiotic prescribing (primary outcome) and re-visits, adverse drug reactions, and parent rated quality of shared decision-making, parent-provider communication and visit satisfaction (secondary outcomes).

**Methods/analysis:** We will attempt to recruit all eligible pediatricians and nurse practitioners (currently 47) at an academic children's hospital and a private practice. Using a 1:1 randomization, providers will be assigned to a Higher Intensity education and communication skills or Lower Intensity education only intervention and trained accordingly. We will recruit 1,600 eligible parent-child dyads. Parents of children ages 1-5 who present with ARTI symptoms will be managed by providers trained in either the Higher or Lower Intensity intervention. Before their consultation, all parents will complete a baseline survey and view a 90-second gain-framed antibiotic educational video. Parent-child dyads consulting with providers trained in the Higher Intensity intervention will, in addition, receive a gain-framed antibiotic educational brochure promoting cautious use of antibiotics and rate their interest in receiving an antibiotic which will be shared with their provider before the visit. All parents will complete a post-consultation survey and a two-week follow-up phone survey. Due to the 2-stage nested design (parents nested within providers and clinics), we will employ generalized linear mixed-effect regression models.

## Interventions to reduce antibiotic misuse 3

1  
2  
3 **Ethics/dissemination:** Ethical approval was obtained from the Children's Mercy Hospital  
4  
5 Pediatric Institutional Review Board (#16060466). Results will be submitted for publication in  
6  
7 peer-reviewed journals.  
8  
9

10  
11 **Trial registration:** NCT03037112  
12  
13  
14  
15  
16  
17  
18  
19  
20  
21  
22  
23  
24  
25  
26  
27  
28  
29  
30  
31  
32  
33  
34  
35  
36  
37  
38  
39  
40  
41  
42  
43  
44  
45  
46  
47  
48  
49  
50  
51  
52  
53  
54  
55  
56  
57  
58  
59  
60

For peer review only

### Strengths and limitations

- Implements a parent-provider communication intervention based on a previously effective intervention and adapted for feasibility in the US pediatric ambulatory setting.
- Works closely with a multicultural group of parents, providers and other stakeholders to ensure feasibility and appropriateness of intervention components, study procedures, and study materials in Spanish and English.
- Adequately powered to detect differences between the Higher and Lower Intensity interventions, with a 1:1 randomization of providers to intervention arms and a target sample of 1600 parents/child dyads.
- Data on primary outcomes (i.e., rates of inappropriate antibiotic prescribing), secondary outcomes (i.e., re-visits and adverse drug reactions, shared decision-making, quality of parent-provider communication and satisfaction), and potential covariates will yield novel insights into the effectiveness of each intervention.
- Provider training was limited to one 20-minute session for all providers and one additional 50-minute session for providers in the Higher Intensity arm.

## Interventions to reduce antibiotic misuse 5

1  
2  
3 Antibiotic overuse and misuse contribute to the development of antibiotic resistant  
4 infections that if left unchecked are estimated to cause 10 million deaths worldwide by 2050.<sup>1</sup> In  
5 the United States (US), antibiotic resistant infections are responsible for at least 23,000 deaths  
6 and an additional 2 million infections annually.<sup>2</sup> Inappropriate antibiotic use also increases  
7 incidence of antibiotic-associated adverse drug reactions (e.g., rash, diarrhea, nausea, and  
8 vomiting), which result in over 140,000 Emergency Department visits every year.<sup>3</sup>

9  
10  
11 The majority of all antibiotic prescribing in the US occurs in the outpatient setting where  
12 children receive 49 million prescriptions annually.<sup>4</sup> Children with acute respiratory tract  
13 infections (ARTIs) receive over 70% of these prescriptions of which 29% are unnecessary (i.e.,  
14 either to treat a viral illness or an unnecessary broad-spectrum antibiotic).<sup>4</sup> Despite some  
15 improvements, the most recent estimates suggest that antibiotics are prescribed for  
16 approximately 50% of ARTIs while it is estimated that only 27% of ARTIs are caused by  
17 bacterial infection.<sup>5</sup> As a result, children are receiving up to 11.4 million unnecessary antibiotic  
18 prescriptions annually.<sup>5</sup> Strikingly, an almost identical number was noted in a similar study  
19 conducted 16 years earlier (11.1 million unnecessary antibiotic prescriptions) suggesting there  
20 are considerable gains still to be made in reducing inappropriate use.<sup>6</sup>

21  
22  
23 Inappropriate antibiotic prescribing in the ambulatory setting has many causes, but the  
24 interaction between parents/legal guardians (hereafter referred to as parents) and providers is  
25 central. For their part, some parents still harbor misconceptions that make them think antibiotics  
26 are necessary when they aren't.<sup>7</sup> Nevertheless, parents generally desire antibiotics for their  
27 children only when absolutely necessary<sup>8</sup> and do not expect antibiotics for common colds.<sup>9</sup>  
28 Instead, parents become dissatisfied when providers minimize children's symptoms, fail to  
29 acknowledge parents' appropriate concerns and/or do not offer a contingency plan if symptoms  
30 fail to resolve.<sup>10,11</sup>

31  
32  
33 Despite evidence to the contrary, providers perceive significant parental pressure for  
34 antibiotics and fear damaging the parent-provider relationship if they withhold prescriptions.<sup>12,13</sup>

1  
2  
3 Combined with the ever-increasing time constraints and focus on parent satisfaction ratings  
4 inherent in modern clinical practice, these beliefs greatly contribute to ineffective parent-provider  
5 communication about antibiotics. When providers perceive that a parent expects or hopes for  
6 an antibiotic, they are more likely to prescribe one.<sup>14,15</sup> In a study of children with viral ARTIs  
7 where no prescription should have been given, providers gave a prescription to 52% of parents  
8 they believed were expecting an antibiotic as compared to only 9% of parents who they believed  
9 were not expecting an antibiotic.<sup>16</sup> Adding to this problem is providers' mistaken belief that they  
10 can accurately predict parents' desires. In fact, providers' ability to accurately predict parents'  
11 expectation for an antibiotic is significantly worse than chance at 24% to 41% concordance.<sup>12,16</sup>  
12 Even though parents rarely state a desire for antibiotics (1% of the time in clinical recordings)  
13 providers report frequent parent demands for antibiotics.<sup>17</sup> Providers also mistakenly believe  
14 that meeting perceived parental expectations for antibiotics is necessary for parent  
15 satisfaction.<sup>13</sup> Parental satisfaction, however, is not related so much to whether or not they  
16 receive an antibiotic but more to the quality of communication with their provider.<sup>10,13</sup> In fact, a  
17 recent observational study demonstrated that the use of what they termed "positive treatment  
18 recommendations" (i.e., comfort care) plus "negative treatment recommendations" (i.e.,  
19 antibiotics won't help) was associated with the highest parent satisfaction.<sup>18</sup>

20  
21  
22 Current efforts to improve appropriate antibiotic use have only indirectly targeted parent-  
23 provider communication<sup>19,20</sup> or have been found to be impractical.<sup>21</sup> As described in several  
24 meta-analytic and systematic reviews, interventions have typically focused on education about  
25 antibiotics for providers or patients.<sup>19,20</sup> While many have been successful in increasing  
26 knowledge about antibiotics and nationally antibiotic prescribing has evidenced modest  
27 reductions,<sup>8,22</sup> more effective strategies that go beyond educational targets are needed to  
28 reduce overprescribing rates to levels that will have a significant impact. A limited number of  
29 studies have been conducted that target parent-provider communication or shared decision-  
30  
31  
32  
33  
34  
35  
36  
37  
38  
39  
40  
41  
42  
43  
44  
45  
46  
47  
48  
49  
50  
51  
52  
53  
54  
55  
56  
57  
58  
59  
60



## Interventions to reduce antibiotic misuse 7

1  
2  
3 making, and they have already produced superior results.<sup>20</sup> Of the communication interventions  
4  
5 tested, only one has directly targeted provider perceptions of parental expectations alongside  
6  
7 antibiotic education and shared decision-making.<sup>23</sup> This study, which employed intensive  
8  
9 provider training and a multi-page patient-provider interactive educational booklet, resulted in a  
10  
11 significant decrease in antibiotic use. The intervention, however, was viewed as burdensome by  
12  
13 providers and impractical for most real world settings.<sup>21</sup> Effective, practical interventions are  
14  
15 needed that address provider misconceptions about parent expectations, facilitate shared-  
16  
17 decision making, and improve aspects of communication that are most likely to increase  
18  
19 parental satisfaction.  
20  
21

22 The goal of this study is to compare two feasible interventions for enhancing parent-  
23  
24 provider communication to reduce the rate of inappropriate antibiotic prescribing. This study will  
25  
26 compare the efficacy of a Higher Intensity provider education and communication skills  
27  
28 intervention to a Lower Intensity provider education only intervention. We hypothesize that the  
29  
30 parent-child dyads managed by providers trained in the Higher Intensity intervention will  
31  
32 demonstrate superiority to dyads managed by providers trained in the Lower Intensity  
33  
34 intervention on the primary outcome of rate of inappropriate antibiotic prescribing, as well as,  
35  
36 the secondary outcomes of re-visits, adverse drug reactions, and parent rated quality of shared  
37  
38 decision making, parent-provider communication and satisfaction.  
39  
40  
41

## 42 **Methods and Analysis**

43  
44 **Patient and Public Involvement:** In the early planning stages for this study, we conducted  
45  
46 focus groups and individual interviews with clinical, parent, payer and community stakeholders  
47  
48 to assess the viability and inform the design of the study. We then recruited a Parent Research  
49  
50 Associate who is a core member of our research team, attends all meetings, contributes to all  
51  
52 decisions about the study and co-leads our Community Advisory Board (CAB). Our CAB is  
53  
54 comprised of 15 parent, provider and community stakeholders and is diverse (i.e., 3 males, 7  
55  
56  
57  
58  
59  
60

1  
2  
3 Latinx [3 exclusively Spanish speaking] and 3 African Americans). CAB meetings will occur  
4 every other month during year 1 and twice yearly in years 2 and 3. All aspect of the study  
5 design, settings, participant burden, materials, procedures, interpretation of data, and  
6 dissemination of study findings have and will be informed by the CAB and Community Research  
7 Associate. Study results will be disseminated to all clinic providers. A parent summary of  
8 findings will be developed and provided to study sites who will be encouraged to post in their  
9 facilities and/or mail to parents.  
10  
11  
12  
13  
14  
15  
16  
17  
18  
19

### 20 *Trial design, setting and participants*

21  
22 **Trial design:** A multi-site parallel group, cluster randomized trial with balanced randomization  
23 (1:1) will be performed in three ambulatory pediatric clinics in the Unites States. Recruitment of  
24 providers will start in January of 2017 and continue throughout the study as new providers are  
25 hired. Providers (physicians and nurse practitioners) will be randomly assigned to training in  
26 either Higher Intensity or Lower Intensity intervention described below. Once providers have  
27 been randomized and trained, eligible parent-child dyads will be enrolled and exposed to  
28 management by a provider who was trained in one of the interventions. Recruitment of parent-  
29 child dyads will start in March of 2017 and continue through December of 2018. Parents in both  
30 arms will receive education on the pros and cons of antibiotics for common infections and tips  
31 for communicating with their provider. Blinding of providers will not be feasible in this study,  
32 however, parents will be blinded as they will not be told what study arm their provider is in, nor  
33 informed about differences between the study interventions. Study team members who conduct  
34 chart review to code appropriateness of antibiotic prescriptions and code session audiotapes for  
35 intervention fidelity will be blinded. The study protocol is in compliance with the Helsinki  
36 Declaration and was reviewed and approved by the Institutional Review Board of Children's  
37 Mercy Hospital (#16060466). PI (KG) will monitor recruitment, retention (bimonthly) and adverse  
38  
39  
40  
41  
42  
43  
44  
45  
46  
47  
48  
49  
50  
51  
52  
53  
54  
55  
56  
57  
58  
59  
60

## Interventions to reduce antibiotic misuse 9

1  
2  
3 events (quarterly; blinded to study arm) in this low risk study. Adverse events, collected from  
4  
5 parents at 2-week follow-up, through chart review and spontaneously from clinic staff. Any  
6  
7 protocol modifications will be submitted for IRB review and communicated to all relevant parties  
8  
9 before implementation.  
10

11  
12  
13 **Randomization:** To protect against practice effects (tendency for providers to have more  
14  
15 consistent beliefs and behaviors within their practice as compared to providers in other  
16  
17 practices), we will randomize providers rather than clinic sites. We did this because the  
18  
19 intervention components are not easily transferred between providers making the risk of  
20  
21 contamination a much smaller threat to validity than practice effects. As detailed below in the  
22  
23 Higher Intensity Provider Training section, we will employ several strategies to reduce the  
24  
25 chance of contamination across study arms. We will use clinic data on visits among our target  
26  
27 population from the past six months to assign each provider to a large or small patient volume  
28  
29 group. The study statistician will then stratify the randomization of providers to ensure each  
30  
31 study arm is balanced across large and small volume providers and across clinics. The study  
32  
33 statistician will place the intervention group assignment in sealed envelopes labeled with  
34  
35 providers' names. Providers will be given their envelopes at the conclusion of a brief study  
36  
37 orientation and informed consent meeting and before completing the baseline assessment.  
38  
39  
40  
41  
42  
43

44 **Setting:** Study sites will be an academic medical center (Children's Mercy Hospital Primary  
45  
46 Care Clinic - CMH PCC) and both locations of a private practice (Heartland Primary Care -  
47  
48 HPC). CMH PCC sees a racially and ethnically diverse group of patients (41% African  
49  
50 American/Black, 29% Hispanic, 18% White) from the Kansas City metropolitan area, of which  
51  
52 73% are covered by Medicaid. CMH PCC has 38 providers (28 pediatricians and 10 nurse  
53  
54 practitioners) and treats approximately 2100 children with an ARTI that meet study inclusion  
55  
56  
57  
58  
59  
60

1  
2  
3 criteria yearly. HPC is a community-based private practice with two locations in sub-urban  
4  
5 Kansas City serving a diverse patient population (14% African American/Black, 16% Hispanic,  
6  
7 75% White; 42% covered by Medicaid). HPC has 9 pediatric providers (6 pediatricians and 3  
8  
9 nurse practitioners) who care for 2000 children that meet study inclusion criteria annually.  
10  
11 Approximately 20% of parents at study sites are Spanish speaking.  
12  
13  
14  
15

16 **Participants:** This study involves providers and parent-child dyads. We will attempt to recruit all  
17  
18 eligible providers at all study sites (pediatricians, pediatric nurse practitioners; n = 47), defined  
19  
20 as those who regularly treat patients that meet our inclusion criteria. Providers primarily  
21  
22 assigned to administration, urgent care or specialty clinics that serve complex care patients will  
23  
24 not be eligible. We will conduct brief study orientation and informed consent meetings to enroll  
25  
26 providers during regularly scheduled clinic meetings or individual contacts.  
27  
28

29 We will recruit up to 1600 parent-child dyads (See Figure 1). Dyads will be eligible if the  
30  
31 patient is between ages 1-5 years (i.e., before sixth birthday), presents with ARTI symptoms  
32  
33 (e.g., cough, congestion, difficulty breathing, sore throat, ear ache) and his/her parent is fluent in  
34  
35 English or Spanish. Children will not be eligible if they have received an antibiotic in the last 30  
36  
37 days, have a concurrent probable bacterial infection (e.g., urinary tract infection, soft tissue  
38  
39 infections), known immunocompromising conditions (e.g., HIV, malignancy, solid-organ  
40  
41 transplant, chronic corticosteroid use), or factors that make shared decision-making around  
42  
43 prescribing an antibiotic extremely complex, like children with complex chronic care conditions  
44  
45 (e.g., cystic fibrosis),<sup>24</sup> or who require hospitalization during the visit. We will include patients  
46  
47 with penicillin allergy as shared decision-making with this group is especially important given  
48  
49 more limited treatment options. Parents or children who have previously participated in the  
50  
51 study will not be eligible to participate again. Potentially eligible dyads will be identified through  
52  
53 prescreening all appointments and parents will be given a study flyer upon check-in. Potential  
54  
55 eligible dyads will be greeted in the exam room before the provider arrives, given a short  
56  
57  
58  
59  
60

## Interventions to reduce antibiotic misuse 11

1  
2  
3 synopsis of the study, and offered eligibility screening. If more than one caregiver is with the  
4 child, they will be asked to designate one person who will complete the informed consent and all  
5 assessments. Providers will have no role in identifying potentially eligible dyads, screening,  
6  
7 consenting or data collection.  
8  
9  
10

### 11 12 13 *Trial Interventions*

14  
15  
16 **Higher Intensity Intervention.** With attention to the feasibility in the US healthcare system, this  
17 intervention will be informed by a series of evidence-based interventions conducted in the UK  
18 and Europe: Enhancing the Quality of Information-sharing in Primary care (EQUIP),<sup>23,25</sup>  
19 Improving the Management of Patients with Acute Cough Trial (IMPACT),<sup>26,27</sup> Stemming the  
20 Tide of Antibiotic Resistance (STAR)<sup>28,29</sup> and Genomics to combat Resistance against  
21 Antibiotics in Community-acquired LRTI in Europe (GRACE).<sup>30</sup>  
22  
23  
24  
25  
26  
27  
28  
29  
30

31 **Higher Intensity Arm Provider Training:** Providers in this arm will receive two trainings. First,  
32 a 20-minute, in-person general education training provided by a study physician (ALM, JGN) will  
33 cover the pros and cons of antibiotics, the impact of inappropriate use, Centers for Disease  
34 Control and Prevention antibiotic prescribing guidelines, common reasons for antibiotic misuse,  
35 and viewing/discussion of the parent educational cartoon (described below). Didactic and  
36 interactive learning strategies will be employed to review the appropriate diagnostic criteria to  
37 help distinguish a viral ARTI from a bacterial ARTI, as well as, the recommended narrow  
38 spectrum antibiotic for bacterial ARTI. Second, providers will receive a 50-minute, in-person  
39 training on parent-centered communication skills provided by a behavioral psychologist (KG).  
40 The training will use a variety of educational strategies including viewing/discussion of  
41 motivational and role model videos, lecture, and group discussion. The goal is to enhance  
42 providers' confidence in use of parent-centered communication strategies (e.g., open ended  
43  
44  
45  
46  
47  
48  
49  
50  
51  
52  
53  
54  
55  
56  
57  
58  
59  
60

1  
2  
3 questions, affirming and elicit-provide-elicit) and the study tri-fold brochure to conduct key  
4 aspects of the EQUIP/IMPACT/STAR/ GRACE interventions during consultations. Specifically,  
5 they will learn to: 1) elicit parents' expectations, 2) affirm parents' concerns, 3) provide an  
6 evidence-based estimate of likely illness duration, 4) provide gain-framed antibiotic information,  
7 5) recommend options for symptom relief, 6) identify triggers for re-consult and contingency  
8 plans, and 7) elicit parents thoughts on the plan. Providers will also learn to use the study tri-fold  
9 brochure to ensure that they complete all necessary aspects of the intervention and provide  
10 written notes for parents to refer to after the visit. The inside of the study tri-fold brochure  
11 provides gain-framed information about when antibiotics are and are not necessary and what  
12 risks are involved in taking antibiotics. Research has shown that people react to the same  
13 tradeoff in different ways depending on whether the possible outcomes are presented as losses  
14 or gains.<sup>31</sup> In this study, we will train providers and tailor our parent materials to highlight the  
15 gains of not using antibiotics (e.g., staying safe from side effects, making sure that effective  
16 cures are available in the future, knowing that their child's body will fight off most ARTI on its  
17 own) that may increase parents' comfort with not getting an antibiotic prescription for their child.  
18 Drawing from the EQUIP study,<sup>25</sup> the outside of the brochure includes a place to write the child's  
19 first name; check boxes to indicate the diagnosis, recommended home care treatments, and  
20 reasons for re-consultation; expected recovery time, if antibiotics are needed, and tips for  
21 communicating with providers.  
22  
23  
24  
25  
26  
27  
28  
29  
30  
31  
32  
33  
34  
35  
36  
37  
38  
39  
40  
41  
42

43 To reduce their reliance on guessing what parents want, providers will also be trained to  
44 rely on parents' antibiotic desire ratings taken from their baseline survey and provided at the  
45 start of each visit via a sticky note on the exam room door where parent-child dyads will be  
46 waiting. To assess fidelity to the communication skills, we will audio record a subsample of visits  
47 (10%) in both Higher and Lower Intensity arms and objectively code use of key communication  
48 strategies using established methods that we have successfully employed in other studies.<sup>32,33</sup>  
49 We will deliver in-person provider training as studies have shown the value of an active  
50  
51  
52  
53  
54  
55  
56  
57  
58  
59  
60

## Interventions to reduce antibiotic misuse 13

1  
2  
3 approach over more passive web-based versions,<sup>34</sup> but we will also develop web-based  
4  
5 refresher trainings.  
6  
7  
8

9 **Higher Intensity Arm Parent Training:** In exam rooms prior to the consultation, parents will  
10 complete the baseline survey, view a 90 second educational cartoon video with accompanying  
11 educational tri-fold brochure and rate their desire for antibiotics via a tablet computer. The  
12 educational video uses gain-framed messages<sup>31,35</sup> to explain when antibiotics are and are not  
13 indicated while emphasizing the risk of side effects and the creation of resistant organisms. It  
14 also highlights what information should be provided during the consultation (e.g., an estimate of  
15 illness duration, recommendations for system relief, and triggers for re-consult and contingency  
16 plans). Parents in this arm will receive a hard copy of the study tri-fold brochure.  
17  
18  
19  
20  
21  
22  
23  
24  
25  
26  
27

28 **Lower Intensity Intervention:** This intervention will be modeled on proven parent and provider  
29 focused educational interventions used in previous studies.<sup>19,34,36–44</sup> Providers will complete the  
30 same 20 minute, in-person general education training described above. Parents will receive the  
31 same parent training described above except that parents will not receive a hard copy of the  
32 study tri-fold brochure and their antibiotic desire ratings will not be shared with providers.  
33  
34  
35  
36  
37  
38

39 Several measures will be taken to reduce the likelihood of contamination between arms.  
40 Specifically, we will: 1) train study team members to ensure that all of our communications  
41 (written or in person) with providers in the Lower Intensity arm do not reveal any of the  
42 strategies from the Higher Intensity training, 2) review the importance of keeping intervention  
43 arms distinct in RCT designs during training, 3) directly ask providers to pledge not to share any  
44 details of the additional communication skills training with their colleagues randomized to the  
45 Lower Intensity arm, 4) control the dissemination of the tri-fold brochure to ensure that only  
46 parents who are consulted by providers in the Higher Intensity arm receive them, and 5) offer  
47 communication strategies for dealing with colleagues who ask for more information.  
48  
49  
50  
51  
52  
53  
54  
55  
56  
57  
58  
59  
60



### *Data Collection*

**Providers/Administrators:** At baseline, providers will complete a brief survey collecting demographic data, and providers' views on parent interest in antibiotics for viral illness, their comfort with telling parents that antibiotics are not necessary, and their concern about parents' responses. Once parent-child dyad recruitment is complete, a brief survey mirroring the baseline provider assessment and a brief (<10 min) semi-structured individual interview will be conducted with providers and administrators to learn about their experience of being in the study, suggestions for improvement and ideas about disseminating to other settings.

Providers/Administrators will not receive incentives for study participation.

**Parents:** At baseline, immediately before their scheduled visit with a provider, parents will complete a brief tablet computer administered Research Electronic Data Capture (REDCap) survey about their antibiotic knowledge and interest in antibiotics for their child's current condition. They will then view the educational video and indicate their interest in antibiotics for their child's current condition again and rate the likelihood of actually receiving antibiotics during their visit. After meeting with their provider, parents will complete a brief survey about their experience of the visit including their rating of shared decision making, satisfaction with parent-provider communication and overall satisfaction with the visit. Two weeks later, parents will be contacted via phone to complete a follow-up survey to assess: resolution of child's illness, any additional healthcare visits and/or treatment, if contingency or "back-up" prescriptions were filled, presence and severity of side effects from any antibiotics administered, use of home care treatment suggested by provider, assessment of the educational video and brochure, and satisfaction with study participation. EMR data will be abstracted using a standardized data collection form and evaluated by study physicians to determine the appropriateness of antibiotic



## Interventions to reduce antibiotic misuse 15

1  
2  
3 prescribing. Parents will be provided with \$10 per completed survey in recognition of their time  
4 and effort.  
5  
6

### 7 *Measures*

8 Interest in assessing patient/parent-provider communication has garnered significant attention,  
9  
10 but measurement challenges remain. Despite a large number of published instruments,  
11  
12 availability of valid, reliable, and scalable measures is a recognized barrier to progress in  
13  
14 research and implementation of patient-centered care.<sup>45</sup> Lack of patient involvement in scale  
15  
16 development has been cited as a contributing factor, so we have engaged parent and provider  
17  
18 stakeholders in the selection of measures for this study. All measures have been adapted based  
19  
20 on their feedback, pilot testing including cognitive debriefing was performed to ensure the  
21  
22 briefest possible assessment of study outcomes. All measures were translated into Spanish  
23  
24 using standard methods and appropriate pilot testing.  
25  
26  
27

### 28 *Primary Outcome*

29  
30 **Antibiotic Prescribing:** Our primary research question is which of the two interventions leads  
31  
32 to a lower rate of inappropriate antibiotic prescribing. We hypothesize that the rate among  
33  
34 providers in the Higher Intensity arm will be lower than the rate produced by providers in the  
35  
36 Lower Intensity arm. If the rates do not significantly differ, we will recommend the Lower  
37  
38 Intensity intervention as preferable for dissemination, as its implementation requires less time  
39  
40 and resources. Inappropriate prescribing will be assessed on a weekly basis by study  
41  
42 physicians, blinded to study arm, who will review the medical record documentation for each  
43  
44 enrolled patient's visit to determine if inappropriate antibiotic prescribing occurred. Prescriptions  
45  
46 will be considered inappropriate if they meet any of the following criteria: 1) antibiotic prescribed  
47  
48 for a viral ARTI, 2) antibiotic prescribed for a presumed bacterial ARTI that does not meet Table  
49  
50 1 criteria, 3) broad-spectrum antibiotic prescribed for a bacterial ARTI in a child without a  
51  
52 penicillin allergy, or 4) non-recommended alternative antibiotic prescribed for a bacterial ARTI  
53  
54  
55  
56  
57  
58  
59  
60

(see Table 2) in a child with a penicillin allergy.

**Table 1. Diagnostic criteria for ARTIs** <sup>19,36,34,46,47</sup>

| Bacterial ARTI                                 | Diagnostic criteria                                                                                                                                                                                                                                                                                                                                               |
|------------------------------------------------|-------------------------------------------------------------------------------------------------------------------------------------------------------------------------------------------------------------------------------------------------------------------------------------------------------------------------------------------------------------------|
| Acute Otitis Media (either criteria)           | 1. Fever $\geq 38.3^{\circ}\text{C}$ ( $101^{\circ}\text{F}$ ) with either a or b:<br>a. Moderate to severe bulging of tympanic membrane on exam, or<br>b. Mild bulging of TM and recent (<48hrs) onset of ear pain<br>2. New onset of otorrhea not due to acute otitis externa                                                                                   |
| Sinusitis (any of the 3 criteria)              | 1. Daytime cough or nasal discharge for greater than 10 days<br>2. High fever ( $>39^{\circ}\text{C}$ ) with purulent nasal discharge or facial pain lasting 3 consecutive days at the beginning of the illness<br>3. Worsening signs or symptoms characterized by the new onset of fever, headache, or increase in nasal discharge following a typical viral URI |
| Community acquired Pneumonia (either criteria) | 1. Fever, tachypnea, and focal findings on pulmonary exam<br>2. a) Fever, b) Tachypnea, cough, or retractions AND c) Chest radiograph consistent with a focal consolidation                                                                                                                                                                                       |
| Streptococcal pharyngitis (both criteria)      | 1. Fever, pharyngitis, & positive rapid streptococcal antigen test or culture<br>2. Lack of viral signs and symptoms                                                                                                                                                                                                                                              |

**Table 2. Appropriate Antibiotic Selection** <sup>19,36,46,47</sup>

| Bacterial ARTI               | Primary Antibiotic | Secondary Antibiotics for Penicillin Allergy                                                                       |
|------------------------------|--------------------|--------------------------------------------------------------------------------------------------------------------|
| Acute Otitis Media           | amoxicillin        | cefdinir, cefpodoxime, ceftriaxone, cefuroxime, clindamycin                                                        |
| Community-acquired Pneumonia | amoxicillin        | cefpodoxime, cefprozil, cefuroxime, clindamycin                                                                    |
| Sinusitis                    | amoxicillin        | cefdinir, cefpodoxime, cefuroxime, clindamycin                                                                     |
| Streptococcal pharyngitis    | amoxicillin        | cephalexin (preferred unless previous type I hypersensitivity reaction to penicillin)<br>clindamycin, azithromycin |

Instead of relying on diagnostic codes as has been done in previous studies,<sup>46,48</sup> the study physicians will assess the appropriateness of the patient's diagnosis by reviewing detailed symptoms, physical examination findings, and diagnostic tests in the EMR. This will guard against the potential bias of relying on diagnostic codes alone, as clinicians sometimes match diagnostic codes to support their antibiotic prescribing.<sup>12</sup> Children determined to have a bacterial infection will need documentation of the specific diagnoses and the clinical criteria confirming that diagnosis (listed in Table 1). Ten percent of all chart reviews will be verified by the other study physician blinded to the initial coding and study group. Overall antibiotic prescription rate

1  
2  
3 for different ARTI diagnoses by arm will also be reported.  
4  
5  
6  
7

### 8 9 *Secondary Outcomes*

10 **Re-visits and Adverse Drug Reactions:** We will determine if children seen by providers in the  
11 two study arms differ in terms of re-visits and/or adverse drug reactions. Data on these clinical  
12 outcomes will be collected via follow-up phone calls with parents conducted two weeks after the  
13 visit. Parents will be asked if any additional healthcare visits and/or treatment occurred and, if  
14 antibiotics were given to the child, if any side effects or adverse drug reactions occurred.  
15  
16  
17  
18  
19

20 Parents will also be asked to report on when their child's symptoms improved, if contingency  
21 prescriptions were filled, use of home care treatment suggested by the provider, assessment of  
22 the educational video and brochure, and satisfaction with study participation.  
23  
24  
25  
26  
27  
28

29 **Shared Decision-Making:** We will assess parent ratings of shared decision-making using an  
30 adapted version of the 3-item CollaboRATE questionnaire.<sup>49</sup> This very brief (< 30 seconds)  
31 scale was developed with input of end-users and assesses the "effort" that providers put forward  
32 to initiate shared decision-making. Members of our community advisory board and participants  
33 in several studies have strongly preferred the CollaboRATE scale to other measures of shared  
34 decision-making, especially for more routine health care issues.<sup>50</sup> Items are: "How much effort  
35 was made to... (1) help you understand your child's health issue?; (2) listen to the things that  
36 matter most to you about your child's health issues?; and (3) include what matters most to you  
37 in choosing what to do next?" Items are scored on a 10-point response scale ranging from 0 "No  
38 effort was made" to 9 "Every effort was made." In a simulation study the CollaboRATE scale  
39 demonstrated discriminative validity between 6 standardized patient-provider encounters that  
40 included varied amounts of shared decision making, concurrent validity with other measures of  
41 SDM, excellent test-retest reliability, and sensitivity to change.<sup>51</sup>  
42  
43  
44  
45  
46  
47  
48  
49  
50  
51  
52  
53  
54  
55  
56  
57  
58  
59  
60

1  
2  
3  
4  
5 **Quality of Parent-Provider Communication:** We will use a single item: “How satisfied were  
6 you with the communication between you and your child’s health care provider?” with a five  
7 point Likert type response format ranging from “Very dissatisfied” to “Very satisfied.”  
8  
9

10  
11  
12  
13 **Overall Satisfaction with the Visit:** We will use a single item: “Overall, how satisfied were you  
14 with the visit?” with a five point Likert type response format ranging from “Very dissatisfied” to  
15 “Very satisfied.”  
16  
17  
18

### 19 *Data Analyses*

20  
21  
22 **Power and sample size:** Prior research examining our primary outcome has shown that 30% of  
23 the antibiotics prescribed in the outpatient ARTI visits are inappropriate.<sup>5</sup> Prior behavioral  
24 intervention studies have produced 20% to 81% reductions in inappropriate prescribing,<sup>46,47</sup> with  
25 statistically significant differences between intervention and control arms (effect sizes: 8.3%<sup>46</sup>  
26 and 13.1%<sup>47</sup>). Based on the ICC observed in the Meeker et al. study which is most similar to our  
27 study, we assume an ICC of .04. Assuming 30% inappropriate prescribing at baseline and a  
28 20% decrease in the Lower Intensity arm and a conservative 50% decrease in the Higher  
29 Intensity arm following intervention, with 40 providers (clusters),  $\alpha$  of .05, and 80% power, we  
30 will need a sample size of 760 per arm to detect a 9% difference between arms (inappropriate  
31 antibiotic 24% in Lower Intensity arm vs. 15% in Higher Intensity arm after intervention).  
32  
33 Consistent with our historical retention rates in similar studies in the same setting, we will  
34 protect against an attrition rate of 5% and aim to recruit 1,600 participants to ensure adequate  
35 power to assess our primary outcome and secondary outcomes.  
36  
37  
38  
39  
40  
41  
42  
43  
44  
45  
46  
47  
48  
49  
50  
51  
52  
53  
54  
55  
56  
57  
58  
59  
60

## Interventions to reduce antibiotic misuse 19

1  
2  
3 **Planned analytic strategy:** All analyses will be conducted using an intent-to-treat strategy with  
4 available data. Initial analyses will examine the underlying distributions of the primary and  
5 secondary outcomes. “Ceiling effects” on these measures of parent satisfaction are not  
6 uncommon and depending on the level of skewness, we may elect to dichotomize specific  
7 scales. We will construct an analytic model to assess the impact of intervention type on our  
8 primary outcome of inappropriate antibiotic prescribing. This is a 2-stage nested design, with  
9 parents nested within providers (Level-1 units) and study site (Level-2 units). Consequently,  
10 ordinary least squares (OLS) and logistic regression models are not appropriate since the data  
11 violate the independently and identically distributed (IID) assumption. We will use generalized  
12 linear mixed-effect regression models (GLMM) using Stata<sup>52</sup> which allow for easy specification  
13 of both fixed and random effects, including accommodating  $\geq 1$  cluster variables. Alternative  
14 covariance structures will be investigated; though we hypothesize the exchangeable (or  
15 compound symmetry) structure will suffice. We will employ robust standard errors to help  
16 minimize misspecification and examine time as a potential random effect. The data will be  
17 analyzed using a post-test only approach. Next, we will examine the effects of the potential  
18 covariates (e.g., parent/patient’s gender, insurance type, parent’s self-reported race and  
19 ethnicity, parent’s educational attainment and provider’s years of clinical experience) on the  
20 primary and secondary outcomes. Our goal is to identify parsimonious final models with the  
21 fewest covariates that best describe the outcomes.  
22  
23  
24  
25  
26  
27  
28  
29  
30  
31  
32  
33  
34  
35  
36  
37  
38  
39  
40  
41  
42  
43

44 Additionally, we will explore the heterogeneity of treatment effect, or the possibility that  
45 one or both of the interventions work better for specific groups. Variables for consideration  
46 include: language spoken at home, language the visit was conducted in, and age of child. We  
47 will create a binary indicator for each variable and include each as an interaction term in the  
48 regression models. We will examine these interaction terms across intervention arms and  
49 explore within-arm differential trends in our primary and secondary outcomes over time.  
50  
51  
52  
53  
54  
55  
56  
57  
58  
59  
60

1  
2  
3  
4  
5 **Missing Data:** All analyses will be conducted with available data. We do not anticipate  
6  
7 important amounts of missing data, as all data for primary outcomes are collected in a single  
8  
9 visit before incentives are offered and we will require responses in the REDCap form.  
10

### 11 12 **Ethics and dissemination**

13  
14 Ethical approval was obtained from the Children's Mercy Hospital Pediatric Institutional  
15  
16 Review Board (#16060466). All participants will provide written informed consent prior to  
17  
18 participating in the study. We will employ multiple strategies to protect confidentiality of personal  
19  
20 information about potential and enrolled participants. Pre-screening of patients will be  
21  
22 conducted exclusively by trained study staff on password protected computers and REDCap  
23  
24 data collection tool. Appointments with potential participants will be flagged in electronic clinic  
25  
26 scheduling systems accessible only to clinic and study staff. Enrolled parent and patient  
27  
28 participants will complete all measures in REDCap projects, which will only be accessible to  
29  
30 study staff who must use multiple passwords to access REDCap through the Children's Mercy  
31  
32 network. Personal identifying information, namely medical record number and contact  
33  
34 information, is marked as an identifier in REDCap and is then censored when the database is  
35  
36 downloaded for analysis. All identifying information will be removed with the deletion of the  
37  
38 REDCap project at the end of the study. Audio files of clinic visits will be stored in a password  
39  
40 protected file on the Children's Mercy server that is only accessible to members of the study  
41  
42 staff. Consent forms and signature logs for reimbursements will be secured in a locked file  
43  
44 cabinet within a locked office on a secured floor.  
45  
46

47  
48 A full data package will be maintained by the investigators at Children's Mercy Hospital  
49  
50 for at least seven years after data collection is complete. Third-party access to the full data  
51  
52 package will be addressed by Children's Mercy Hospital on a case-by-case basis.  
53  
54  
55  
56  
57  
58  
59  
60

## Interventions to reduce antibiotic misuse 21

1  
2  
3 Results will be disseminated through publication in peer-reviewed journals and conference  
4 presentations. Study progress and findings will also be updated on [clinicaltrials.gov](https://clinicaltrials.gov)  
5  
6  
7 (#NCT03037112).  
8  
9

## 10 11 12 13 14 15 16 Discussion

17  
18 Effective parent-provider communication facilitates rapport-building, exchange of critical  
19 information, and shared decision-making which ultimately has the potential to reduce  
20 inappropriate antibiotic prescribing and use. Nevertheless, efficacious and feasible training  
21 interventions that enhance effective parent-provider communication, shared decision making  
22 and antibiotic prescribing are lacking. This study will be the first to compare the efficacy of two  
23 interventions directly targeting parent-provider communication about antibiotics in the US  
24 outpatient pediatric setting. It will also provide novel insights about parental expectations for  
25 antibiotics following the receipt of gain-framed information and providers' experience of the  
26 interventions. If successful, the superior intervention could be widely disseminated and  
27 potentially lead to reduced health care costs through more appropriate antibiotic use, decreased  
28 additional visits by parents who may not have felt satisfied with their initial visit and ultimately  
29 less antibiotic resistance.  
30  
31  
32  
33  
34  
35  
36  
37  
38  
39  
40  
41  
42  
43  
44

## 45 Figure Legends

46  
47 Figure 1: Schematic diagram of parent-patient dyad participant flow  
48  
49  
50  
51  
52  
53  
54  
55  
56  
57  
58  
59  
60

### **Acknowledgements**

Research reported in this publication was supported through a Patient-Centered Outcomes Research Institute (PCORI) Program Award (CDR-1507-31759). All statements in this report, including its findings and conclusions, are solely those of the authors and do not necessarily represent the views of the Patient-Centered Outcomes Research Institute (PCORI), its Board of Governors or Methodology Committee. The authors wish to acknowledge the contributions by parent stakeholders on our Community Advisory Board and clinical stakeholders at Children's Mercy Primary Care Clinics and Heartland Clinics in designing this study.

### **Competing Interests**

The authors declare no competing interests.

### **Author Contributions**

All authors made substantial contributions to the design of the study. KG, ABE, ALM, BRL, EAH and JGN contributed to drafting the protocol and revising it critically for important intellectual content. KBD SS AR KP DY KW SL CCB contributed critical revisions to the draft for important intellectual content. All authors reviewed and approved of the final version submitted for publication and agree to be accountable for all aspects of the work in ensuring that questions related to accuracy and integrity are appropriately investigated and resolved.



## References

1. O'Neill J. Antimicrobial Resistance : Tackling a crisis for the health and wealth of nations. *Rev Antimicrob Resist.* 2014;(December):1-16. doi:10.1038/510015a.
2. Centres for Disease Control and Prevention. *Antibiotic Resistance Threats in the United States, 2013.* Atlanta; 2013. <http://www.cdc.gov/drugresistance/threat-report-2013/>.
3. Shehab N, Patel PR, Srinivasan A, Budnitz DS. Emergency department visits for antibiotic-associated adverse events. *Clin Infect Dis.* 2008;47(6):735-743. doi:10.1086/591126.
4. Hersh AL, Shapiro DJ, Pavia AT, Shah SS. Antibiotic prescribing in ambulatory pediatrics in the United States. *Pediatrics.* 2011;128(6):1053-1061. doi:10.1542/peds.2011-1337.
5. Kronman MP, Zhou C, Mangione-Smith R. Bacterial prevalence and antimicrobial prescribing trends for acute respiratory tract infections. *Pediatrics.* 2014;134(4):e956-65. doi:10.1542/peds.2014-0605.
6. Nyquist AC, Gonzales R, Steiner JF, Sande MA. Antibiotic prescribing for children with colds, upper respiratory tract infections, and bronchitis. *Jama.* 1998;279(11):875-877. doi:10.1001/jama.279.11.875.
7. Vaz LE, Kleinman KP, Raebel MA, et al. Recent trends in outpatient antibiotic use in children. *Pediatrics.* 2014;133(3):375-385. doi:10.1542/peds.2013-2903.
8. Finkelstein JA, Dutta-Linn M, Meyer R, Goldman R. Childhood infections, antibiotics, and resistance: what are parents saying now? *Clin Pediatr (Phila).* 2014;53(2):145-150. doi:10.1177/0009922813505902.
9. Havens L, Schwartz M. Identification of Parents Perceptions of Antibiotic Use for Individualized Community Education. *Glob Pediatr Heal.* 2016;3(0). doi:10.1177/2333794X16654067.
10. Cabral C, Horwood J, Hay AD, Lucas PJ. How communication affects prescription decisions in consultations for acute illness in children: a systematic review and meta-ethnography. *BMC Fam Pract.* 2014;15(1):63. doi:10.1186/1471-2296-15-63.
11. Cabral C, Ingram J, Lucas PJ, et al. Influence of Clinical Communication on Parents' Antibiotic Expectations for Children With Respiratory Tract Infections. *Ann Fam Med.* 2016;14(2):141-147. doi:10.1370/afm.1892.
12. Szymczak JE, Feemster KA, Zaoutis TE, Gerber JS. Pediatrician Perceptions of an Outpatient Antimicrobial Stewardship Intervention. *Infect Control Hosp Epidemiol.* 2014;35(S3):S69-S78. doi:10.1086/677826.
13. Tonkin-Crine S, Yardley L, Little P. Antibiotic prescribing for acute respiratory tract infections in primary care: a systematic review and meta-ethnography. *J Antimicrob Chemother.* 2011;66(10):2215-2223. doi:10.1093/jac/dkr279.
14. Cho H-J, Hong S-J, Park S. Knowledge and beliefs of primary care physicians, pharmacists, and parents on antibiotic use for the pediatric common cold. *Soc Sci Med.* 2004;58(3):623-629. doi:10.1016/S0277-9536(03)00231-4.
15. Vinson DC, Lutz LJ. The effect of parental expectations on treatment of children with a cough: a report from ASPN. *J Fam Pract.* 1993;37:23-27.
16. Mangione-Smith R, McGlynn EA, Elliott MN, Krogstad P, Brook RH. The relationship between perceived parental expectations and pediatrician antimicrobial prescribing behavior. *Pediatrics.* 1999;103(4):711-718. doi:10.1542/peds.103.4.711.
17. Mangione-Smith R, McGlynn EA, Elliott MN, McDonald L, Franz CE, Kravitz RL. Parent expectations for antibiotics, physician-parent communication, and satisfaction. *Arch Pediatr Adolesc Med.* 2001;155(July 2001):800-806. doi:10.1001/archpedi.155.7.800.

18. Mangione-Smith R, Zhou C, Robinson JD, Taylor JA, Elliott MN, Heritage J. Communication practices and antibiotic use for acute respiratory tract infections in children. *Ann Fam Med*. 2015;13(3):221-227. doi:10.1370/afm.1785.
19. Andrews T, Thompson M, Buckley DI, et al. Interventions to influence consulting and antibiotic use for acute respiratory tract infections in children: A systematic review and Meta-Analysis. *PLoS One*. 2012;7(1). doi:10.1371/journal.pone.0030334.
20. Hu Y, Walley J, Chou R, et al. Interventions to reduce childhood antibiotic prescribing for upper respiratory infections: systematic review and meta-analysis. *J Epidemiol Community Health*. 2016;jech-2015-206543. doi:10.1136/jech-2015-206543.
21. Francis NA, Phillips R, Wood F, Hood K, Simpson S, Butler CC. Parents' and clinicians' views of an interactive booklet about respiratory tract infections in children: a qualitative process evaluation of the EQUIP randomised controlled trial. *BMC Fam Pract*. 2013;14(1):182. doi:10.1186/1471-2296-14-182.
22. Grijalva CG, Nuorti JP, Griffin MR. Antibiotic Prescription Rates for Acute Respiratory Tract Infections in US Ambulatory Settings. *JAMA*. 2009;302(7):758. doi:10.1001/jama.2009.1163.
23. Francis NA, Butler CC, Hood K, Simpson S, Wood F, Nuttall J. Effect of using an interactive booklet about childhood respiratory tract infections in primary care consultations on reconsulting and antibiotic prescribing: a cluster randomised controlled trial. *BMJ*. 2009;339:b2885. doi:10.1136/bmj.b2885.
24. Feudtner C, Feinstein JA, Zhong W, Hall M, Dai D. Pediatric complex chronic conditions classification system version 2: updated for ICD-10 and complex medical technology dependence and transplantation. *BMC Pediatr*. 2014;14(1):199. doi:10.1186/1471-2431-14-199.
25. Francis NA, Hood K, Simpson S, Wood F, Nuttall J, Butler CC. The effect of using an interactive booklet on childhood respiratory tract infections in consultations: Study protocol for a cluster randomised controlled trial in primary care. *BMC Fam Pract*. 2008;9(1):23. doi:10.1186/1471-2296-9-23.
26. Cals JW, Scheppers NAM, Hopstaken RM, et al. Evidence based management of acute bronchitis; sustained competence of enhanced communication skills acquisition in general practice. *Patient Educ Couns*. 2007;68(3):270-278. doi:10.1016/j.pec.2007.06.014.
27. Cals JW, Butler CC, Hopstaken RM, Hood K, Dinant GJ. Effect of point of care testing for C reactive protein and training in communication skills on antibiotic use in lower respiratory tract infections: cluster randomised trial. *BMJ*. 2009;338:b1374-b1374. doi:10.1136/bmj.b1374.
28. Butler CC, Simpson SA, Dunstan F, et al. Effectiveness of multifaceted educational programme to reduce antibiotic dispensing in primary care: practice based randomised controlled trial. *BMJ*. 2012;344:d8173-d8173. doi:10.1136/bmj.d8173.
29. Bekkers M-J, Simpson SA, Dunstan F, et al. Enhancing the quality of antibiotic prescribing in Primary Care: Qualitative evaluation of a blended learning intervention. *BMC Fam Pract*. 2010;11(1):34. doi:10.1186/1471-2296-11-34.
30. Little P, Stuart B, Francis N, et al. Effects of internet-based training on antibiotic prescribing rates for acute respiratory-tract infections: A multinational, cluster, randomised, factorial, controlled trial. *Lancet*. 2013;382(9899):1175-1182. doi:10.1016/S0140-6736(13)60994-0.
31. Matjasko JL, Cawley JH, Baker-Goering MM, Yokum D V. Applying Behavioral Economics to Public Health Policy: Illustrative Examples and Promising Directions. *Am J Prev Med*. 2016;50(5):S13-S19. doi:10.1016/j.amepre.2016.02.007.
32. Catley D, Harris KJ, Goggin K, et al. Motivational Interviewing for encouraging quit attempts among unmotivated smokers: study protocol of a randomized, controlled, efficacy trial. *BMC Public Health*. 2012;12(1):456. doi:10.1186/1471-2458-12-456.
33. Goggin K, Gerkovich MM, Williams KB, et al. A randomized controlled trial examining the

## Interventions to reduce antibiotic misuse 25

- efficacy of motivational counseling with observed therapy for antiretroviral therapy adherence. *AIDS Behav.* 2013;17(6):1992-2001. doi:10.1007/s10461-013-0467-3.
34. Ranji SR, Steinman MA, Shojania KG, Gonzales R. Interventions to reduce unnecessary antibiotic prescribing: a systematic review and quantitative analysis. *Med Care.* 2008;46(8):847-862. doi:10.1097/MLR.0b013e318178eabd.
35. Bartels RD, Kelly KM, Rothman AJ. Moving beyond the function of the health behaviour: The effect of message frame on behavioural decision-making. *Psychol Heal.* 2010;25(7):821-838. doi:10.1080/08870440902893708.
36. Van Der Velden AW, Pijpers EJ, Kuyvenhoven MM, Tonkin-Crine SKG, Little P, Verheij TJM. Effectiveness of physician-targeted interventions to improve antibiotic use for respiratory tract infections. *Br J Gen Pract.* 2012;62(605). doi:10.3399/bjgp12X659268.
37. Maor Y, Raz M, Rubinstein E, et al. Changing parents' opinions regarding antibiotic use in primary care. *Eur J Pediatr.* 2011;170(3):359-364. doi:10.1007/s00431-010-1301-9.
38. Schnellinger M, Finkelstein M, Thygeson M V, Vander Velden H, Karpas A, Madhok M. Animated video vs pamphlet: comparing the success of educating parents about proper antibiotic use. *Pediatrics.* 2010;125(5):990-996. doi:10.1542/peds.2009-2916.
39. Taylor JA, Kwan-Gett TSC, McMahon Jr EM. Effectiveness of a parental educational intervention in reducing antibiotic use in children: A randomized controlled trial. *Pediatr Infect Dis J.* 2005;24(6):489-493. doi:http://dx.doi.org/10.1097/01.inf.0000164706.91337.5d.
40. González OE, Armas PL, Bravo GJ, Cabrales EJ, Corrales RR, Abreu SG. Prescription of antibiotics for mild acute respiratory infections in children. *Bull Pan Am Health Organ.* 1996;30(2):106-117.
41. Hennessy TW, Petersen KM, Bruden D, et al. Changes in Antibiotic-Prescribing Practices and Carriage of Penicillin-Resistant *Streptococcus pneumoniae*: A Controlled Intervention Trial in Rural Alaska. *Clin Infect Dis.* 2002;34(12):1543-1550. doi:10.1086/340534.
42. Hingorani R, Mahmood M, Alweis R. Improving antibiotic adherence in treatment of acute upper respiratory infections: a quality improvement process. *J community Hosp Intern Med Perspect.* 2015;5(3):27472. doi:10.3402/jchimp.v5.27472.
43. Juzych NS, Banerjee M, Essenmacher L, Lerner SA. Improvements in antimicrobial prescribing for treatment of upper respiratory tract infections through provider education. *J Gen Intern Med.* 2005;20(10):901-905. doi:10.1111/j.1525-1497.2005.0198.x.
44. Smeets HM, De Wit NJ, Delnoij DMJ, Hoes AW. Patient attitudes towards and experiences with an intervention programme to reduce chronic acid-suppressing drug intake in primary care. *Eur J Gen Pract.* 2009;15(4):219-225. doi:10.3109/13814780903452168.
45. Scholl I, Koelewijn-van Loon M, Sepucha K, et al. Measurement of shared decision making - A review of instruments. *Z Evid Fortbild Qual Gesundheitswes.* 2011;105(4):313-324. doi:10.1016/j.zefq.2011.04.012.
46. Gerber JS, Prasad PA, Fiks AG, et al. Effect of an Outpatient Antimicrobial Stewardship Intervention on Broad-Spectrum Antibiotic Prescribing by Primary Care Pediatricians. *JAMA.* 2013;309(22):2345. doi:10.1001/jama.2013.6287.
47. Meeker D, Linder JA, Fox CR, et al. Effect of Behavioral Interventions on Inappropriate Antibiotic Prescribing Among Primary Care Practices: A Randomized Clinical Trial. *J Am Med Assoc.* 2016;315(6):562-570. doi:10.1001/jama.2016.0275.
48. Finkelstein JA, Davis RL, Dowell SF, et al. Reducing antibiotic use in children: a randomized trial in 12 practices. *Pediatrics.* 2001;108(1):1-7. doi:10.1542/peds.108.1.1.
49. Elwyn G, Barr PJ, Grande SW, Thompson R, Walsh T, Ozanne EM. Developing CollaboRATE: A fast and frugal patient-reported measure of shared decision making in clinical encounters. *Patient Educ Couns.* 2013;93(1):102-107. doi:10.1016/j.pec.2013.05.009.
50. Barr PJ, Elwyn G. Measurement challenges in shared decision making: putting the "patient" in

- 1  
2  
3 patient-reported measures. *Heal Expect*. 2016;19(5):993-1001. doi:10.1111/hex.12380.  
4 51. Barr PJ, Thompson R, Walsh T, Grande SW, Ozanne EM, Elwyn G. The psychometric  
5 properties of collaborate: A fast and frugal patient-reported measure of the shared decision-  
6 making process. *J Med Internet Res*. 2014;16(1):1-19. doi:10.2196/jmir.3085.  
7 52. StataCorp. Stata Statistical Software: Release 14. 2015. 2015.  
8  
9  
10  
11  
12  
13  
14  
15  
16  
17  
18  
19  
20  
21  
22  
23  
24  
25  
26  
27  
28  
29  
30  
31  
32  
33  
34  
35  
36  
37  
38  
39  
40  
41  
42  
43  
44  
45  
46  
47  
48  
49  
50  
51  
52  
53  
54  
55  
56  
57  
58  
59  
60

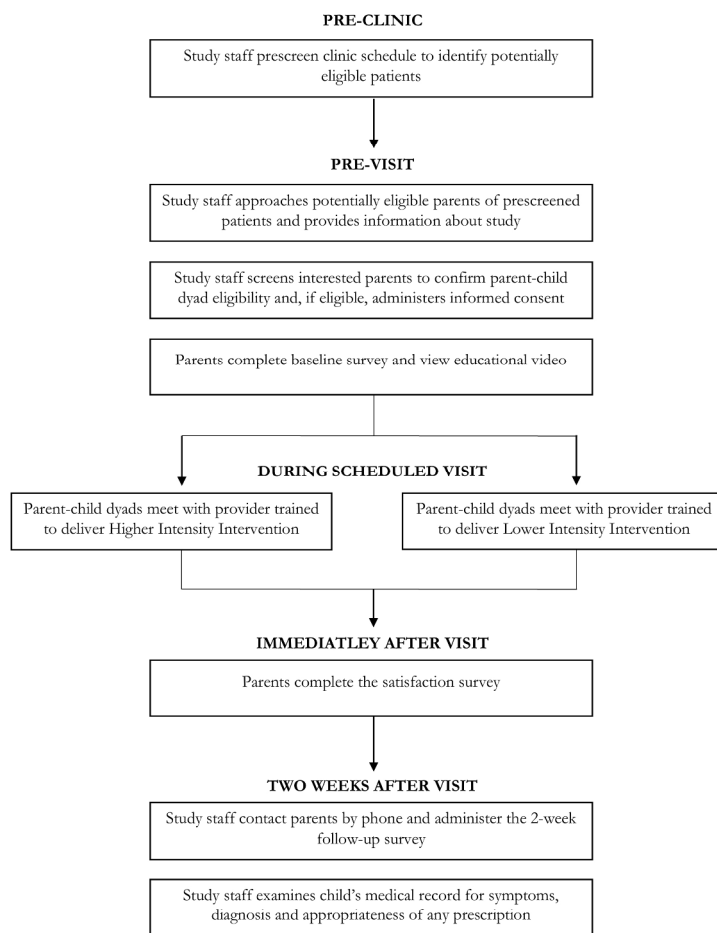

Figure 1: Schematic diagram of parent-patient dyad participant flow

215x279mm (300 x 300 DPI)

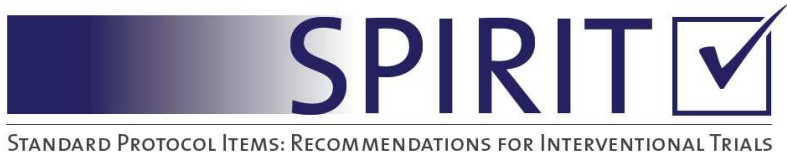

SPIRIT 2013 Checklist: Recommended items to address in a clinical trial protocol and related documents\*

| Section/item                      | Item No | Description                                                                                                                                                                                                                                                                              | Addressed on page number                          |
|-----------------------------------|---------|------------------------------------------------------------------------------------------------------------------------------------------------------------------------------------------------------------------------------------------------------------------------------------------|---------------------------------------------------|
| <b>Administrative information</b> |         |                                                                                                                                                                                                                                                                                          |                                                   |
| Title                             | 1       | Descriptive title identifying the study design, population, interventions, and, if applicable, trial acronym                                                                                                                                                                             | __1__                                             |
| Trial registration                | 2a      | Trial identifier and registry name. If not yet registered, name of intended registry                                                                                                                                                                                                     | __3__                                             |
|                                   | 2b      | All items from the World Health Organization Trial Registration Data Set                                                                                                                                                                                                                 | <u>throughout document and NCT trial registry</u> |
| Protocol version                  | 3       | Date and version identifier                                                                                                                                                                                                                                                              | __1__                                             |
| Funding                           | 4       | Sources and types of financial, material, and other support                                                                                                                                                                                                                              | __21__                                            |
| Roles and responsibilities        | 5a      | Names, affiliations, and roles of protocol contributors                                                                                                                                                                                                                                  | __1__                                             |
|                                   | 5b      | Name and contact information for the trial sponsor                                                                                                                                                                                                                                       | __21__                                            |
|                                   | 5c      | Role of study sponsor and funders, if any, in study design; collection, management, analysis, and interpretation of data; writing of the report; and the decision to submit the report for publication, including whether they will have ultimate authority over any of these activities | <u>None (see p. 21)</u>                           |

|    |    |                                                                                                                                                                                                                                                                  |         |
|----|----|------------------------------------------------------------------------------------------------------------------------------------------------------------------------------------------------------------------------------------------------------------------|---------|
| 1  |    |                                                                                                                                                                                                                                                                  |         |
| 2  |    |                                                                                                                                                                                                                                                                  |         |
| 3  | 5d | Composition, roles, and responsibilities of the coordinating centre, steering committee, endpoint adjudication committee, data management team, and other individuals or groups overseeing the trial, if applicable (see Item 21a for data monitoring committee) | __N/A__ |
| 4  |    |                                                                                                                                                                                                                                                                  |         |
| 5  |    |                                                                                                                                                                                                                                                                  |         |
| 6  |    |                                                                                                                                                                                                                                                                  |         |
| 7  |    |                                                                                                                                                                                                                                                                  |         |
| 8  |    |                                                                                                                                                                                                                                                                  |         |
| 9  |    |                                                                                                                                                                                                                                                                  |         |
| 10 |    |                                                                                                                                                                                                                                                                  |         |

## Introduction

|    |                          |    |                                                                                                                                                                                                           |
|----|--------------------------|----|-----------------------------------------------------------------------------------------------------------------------------------------------------------------------------------------------------------|
| 11 |                          |    |                                                                                                                                                                                                           |
| 12 |                          |    |                                                                                                                                                                                                           |
| 13 | Background and rationale | 6a | Description of research question and justification for undertaking the trial, including summary of relevant studies (published and unpublished) examining benefits and harms for each intervention        |
| 14 |                          |    | __5-7__                                                                                                                                                                                                   |
| 15 |                          |    |                                                                                                                                                                                                           |
| 16 |                          | 6b | Explanation for choice of comparators                                                                                                                                                                     |
| 17 |                          |    | __6-7__                                                                                                                                                                                                   |
| 18 | Objectives               | 7  | Specific objectives or hypotheses                                                                                                                                                                         |
| 19 |                          |    | __7__                                                                                                                                                                                                     |
| 20 | Trial design             | 8  | Description of trial design including type of trial (eg, parallel group, crossover, factorial, single group), allocation ratio, and framework (eg, superiority, equivalence, noninferiority, exploratory) |
| 21 |                          |    | __7__                                                                                                                                                                                                     |
| 22 |                          |    |                                                                                                                                                                                                           |

## Methods: Participants, interventions, and outcomes

|    |                      |     |                                                                                                                                                                                                |
|----|----------------------|-----|------------------------------------------------------------------------------------------------------------------------------------------------------------------------------------------------|
| 23 |                      |     |                                                                                                                                                                                                |
| 24 |                      |     |                                                                                                                                                                                                |
| 25 | Study setting        | 9   | Description of study settings (eg, community clinic, academic hospital) and list of countries where data will be collected. Reference to where list of study sites can be obtained             |
| 26 |                      |     | __8-9__                                                                                                                                                                                        |
| 27 |                      |     |                                                                                                                                                                                                |
| 28 | Eligibility criteria | 10  | Inclusion and exclusion criteria for participants. If applicable, eligibility criteria for study centres and individuals who will perform the interventions (eg, surgeons, psychotherapists)   |
| 29 |                      |     | __9-10__                                                                                                                                                                                       |
| 30 |                      |     |                                                                                                                                                                                                |
| 31 | Interventions        | 11a | Interventions for each group with sufficient detail to allow replication, including how and when they will be administered                                                                     |
| 32 |                      |     | __10-13__                                                                                                                                                                                      |
| 33 |                      |     |                                                                                                                                                                                                |
| 34 |                      | 11b | Criteria for discontinuing or modifying allocated interventions for a given trial participant (eg, drug dose change in response to harms, participant request, or improving/worsening disease) |
| 35 |                      |     | __9__                                                                                                                                                                                          |
| 36 |                      |     |                                                                                                                                                                                                |
| 37 |                      | 11c | Strategies to improve adherence to intervention protocols, and any procedures for monitoring adherence (eg, drug tablet return, laboratory tests)                                              |
| 38 |                      |     | __11-12__                                                                                                                                                                                      |
| 39 |                      |     |                                                                                                                                                                                                |
| 40 |                      | 11d | Relevant concomitant care and interventions that are permitted or prohibited during the trial                                                                                                  |
| 41 |                      |     | __9-10__                                                                                                                                                                                       |
| 42 |                      |     |                                                                                                                                                                                                |



|    |                      |    |                                                                                                                                                                                                                                                                                                                                                                                |                       |
|----|----------------------|----|--------------------------------------------------------------------------------------------------------------------------------------------------------------------------------------------------------------------------------------------------------------------------------------------------------------------------------------------------------------------------------|-----------------------|
| 1  |                      |    |                                                                                                                                                                                                                                                                                                                                                                                |                       |
| 2  |                      |    |                                                                                                                                                                                                                                                                                                                                                                                |                       |
| 3  | Outcomes             | 12 | Primary, secondary, and other outcomes, including the specific measurement variable (eg, systolic blood pressure), analysis metric (eg, change from baseline, final value, time to event), method of aggregation (eg, median, proportion), and time point for each outcome. Explanation of the clinical relevance of chosen efficacy and harm outcomes is strongly recommended | __14-17__             |
| 4  |                      |    |                                                                                                                                                                                                                                                                                                                                                                                |                       |
| 5  |                      |    |                                                                                                                                                                                                                                                                                                                                                                                |                       |
| 6  |                      |    |                                                                                                                                                                                                                                                                                                                                                                                |                       |
| 7  |                      |    |                                                                                                                                                                                                                                                                                                                                                                                |                       |
| 8  | Participant timeline | 13 | Time schedule of enrolment, interventions (including any run-ins and washouts), assessments, and visits for participants. A schematic diagram is highly recommended (see Figure)                                                                                                                                                                                               | __9-13 and Figure 1__ |
| 9  |                      |    |                                                                                                                                                                                                                                                                                                                                                                                |                       |
| 10 |                      |    |                                                                                                                                                                                                                                                                                                                                                                                |                       |
| 11 | Sample size          | 14 | Estimated number of participants needed to achieve study objectives and how it was determined, including clinical and statistical assumptions supporting any sample size calculations                                                                                                                                                                                          | __17__                |
| 12 |                      |    |                                                                                                                                                                                                                                                                                                                                                                                |                       |
| 13 |                      |    |                                                                                                                                                                                                                                                                                                                                                                                |                       |
| 14 | Recruitment          | 15 | Strategies for achieving adequate participant enrolment to reach target sample size                                                                                                                                                                                                                                                                                            | __9-10, 14__          |
| 15 |                      |    |                                                                                                                                                                                                                                                                                                                                                                                |                       |

### 16 **Methods: Assignment of interventions (for controlled trials)**

#### 17 Allocation:

|    |                                  |     |                                                                                                                                                                                                                                                                                                                                                          |             |
|----|----------------------------------|-----|----------------------------------------------------------------------------------------------------------------------------------------------------------------------------------------------------------------------------------------------------------------------------------------------------------------------------------------------------------|-------------|
| 18 |                                  |     |                                                                                                                                                                                                                                                                                                                                                          |             |
| 19 |                                  |     |                                                                                                                                                                                                                                                                                                                                                          |             |
| 20 | Sequence generation              | 16a | Method of generating the allocation sequence (eg, computer-generated random numbers), and list of any factors for stratification. To reduce predictability of a random sequence, details of any planned restriction (eg, blocking) should be provided in a separate document that is unavailable to those who enrol participants or assign interventions | __8__       |
| 21 |                                  |     |                                                                                                                                                                                                                                                                                                                                                          |             |
| 22 |                                  |     |                                                                                                                                                                                                                                                                                                                                                          |             |
| 23 |                                  |     |                                                                                                                                                                                                                                                                                                                                                          |             |
| 24 |                                  |     |                                                                                                                                                                                                                                                                                                                                                          |             |
| 25 | Allocation concealment mechanism | 16b | Mechanism of implementing the allocation sequence (eg, central telephone; sequentially numbered, opaque, sealed envelopes), describing any steps to conceal the sequence until interventions are assigned                                                                                                                                                | __8__       |
| 26 |                                  |     |                                                                                                                                                                                                                                                                                                                                                          |             |
| 27 |                                  |     |                                                                                                                                                                                                                                                                                                                                                          |             |
| 28 |                                  |     |                                                                                                                                                                                                                                                                                                                                                          |             |
| 29 | Implementation                   | 16c | Who will generate the allocation sequence, who will enrol participants, and who will assign participants to interventions                                                                                                                                                                                                                                | __8__       |
| 30 |                                  |     |                                                                                                                                                                                                                                                                                                                                                          |             |
| 31 |                                  |     |                                                                                                                                                                                                                                                                                                                                                          |             |
| 32 |                                  |     |                                                                                                                                                                                                                                                                                                                                                          |             |
| 33 | Blinding (masking)               | 17a | Who will be blinded after assignment to interventions (eg, trial participants, care providers, outcome assessors, data analysts), and how                                                                                                                                                                                                                | __8,14,15__ |
| 34 |                                  |     |                                                                                                                                                                                                                                                                                                                                                          |             |
| 35 |                                  |     |                                                                                                                                                                                                                                                                                                                                                          |             |
| 36 |                                  | 17b | If blinded, circumstances under which unblinding is permissible, and procedure for revealing a participant's allocated intervention during the trial                                                                                                                                                                                                     | __N/A__     |
| 37 |                                  |     |                                                                                                                                                                                                                                                                                                                                                          |             |
| 38 |                                  |     |                                                                                                                                                                                                                                                                                                                                                          |             |

### 39 **Methods: Data collection, management, and analysis**



|    |                            |     |                                                                                                               |              |
|----|----------------------------|-----|---------------------------------------------------------------------------------------------------------------|--------------|
| 1  |                            |     |                                                                                                               |              |
| 2  |                            |     |                                                                                                               |              |
| 3  | Data collection            | 18a | Plans for assessment and collection of outcome, baseline, and other trial data, including any related         | _13-17_____  |
| 4  | methods                    |     | processes to promote data quality (eg, duplicate measurements, training of assessors) and a description of    |              |
| 5  |                            |     | study instruments (eg, questionnaires, laboratory tests) along with their reliability and validity, if known. |              |
| 6  |                            |     | Reference to where data collection forms can be found, if not in the protocol                                 |              |
| 7  |                            |     |                                                                                                               |              |
| 8  |                            | 18b | Plans to promote participant retention and complete follow-up, including list of any outcome data to be       | _13-16_____  |
| 9  |                            |     | collected for participants who discontinue or deviate from intervention protocols                             |              |
| 10 |                            |     |                                                                                                               |              |
| 11 | Data management            | 19  | Plans for data entry, coding, security, and storage, including any related processes to promote data quality  | _13, 17_____ |
| 12 |                            |     | (eg, double data entry; range checks for data values). Reference to where details of data management          |              |
| 13 |                            |     | procedures can be found, if not in the protocol                                                               |              |
| 14 |                            |     |                                                                                                               |              |
| 15 | Statistical methods        | 20a | Statistical methods for analysing primary and secondary outcomes. Reference to where other details of the     | _17-18_____  |
| 16 |                            |     | statistical analysis plan can be found, if not in the protocol                                                |              |
| 17 |                            |     |                                                                                                               |              |
| 18 |                            | 20b | Methods for any additional analyses (eg, subgroup and adjusted analyses)                                      | _18_____     |
| 19 |                            |     |                                                                                                               |              |
| 20 |                            | 20c | Definition of analysis population relating to protocol non-adherence (eg, as randomised analysis), and any    |              |
| 21 |                            |     | statistical methods to handle missing data (eg, multiple imputation)                                          | _17_____     |
| 22 |                            |     |                                                                                                               |              |
| 23 |                            |     |                                                                                                               |              |
| 24 | <b>Methods: Monitoring</b> |     |                                                                                                               |              |
| 25 |                            |     |                                                                                                               |              |
| 26 | Data monitoring            | 21a | Composition of data monitoring committee (DMC); summary of its role and reporting structure; statement of     | _8_____      |
| 27 |                            |     | whether it is independent from the sponsor and competing interests; and reference to where further details    |              |
| 28 |                            |     | about its charter can be found, if not in the protocol. Alternatively, an explanation of why a DMC is not     |              |
| 29 |                            |     | needed                                                                                                        |              |
| 30 |                            |     |                                                                                                               |              |
| 31 |                            | 21b | Description of any interim analyses and stopping guidelines, including who will have access to these interim  | _8_____      |
| 32 |                            |     | results and make the final decision to terminate the trial                                                    |              |
| 33 |                            |     |                                                                                                               |              |
| 34 | Harms                      | 22  | Plans for collecting, assessing, reporting, and managing solicited and spontaneously reported adverse         | _8_____      |
| 35 |                            |     | events and other unintended effects of trial interventions or trial conduct                                   |              |
| 36 |                            |     |                                                                                                               |              |
| 37 | Auditing                   | 23  | Frequency and procedures for auditing trial conduct, if any, and whether the process will be independent      | _8_____      |
| 38 |                            |     | from investigators and the sponsor                                                                            |              |
| 39 |                            |     |                                                                                                               |              |

## 40 Ethics and dissemination

1  
2  
3 Research ethics 24 Plans for seeking research ethics committee/institutional review board (REC/IRB) approval 8  
4 approval  
5  
6 Protocol 25 Plans for communicating important protocol modifications (eg, changes to eligibility criteria, outcomes, 8  
7 amendments analyses) to relevant parties (eg, investigators, REC/IRBs, trial participants, trial registries, journals, 8  
8 regulators)  
9  
10 Consent or assent 26a Who will obtain informed consent or assent from potential trial participants or authorised surrogates, and 8-10  
11 how (see Item 32)  
12  
13 26b Additional consent provisions for collection and use of participant data and biological specimens in ancillary N/A  
14 studies, if applicable  
15  
16 Confidentiality 27 How personal information about potential and enrolled participants will be collected, shared, and maintained 19  
17 in order to protect confidentiality before, during, and after the trial  
18  
19 Declaration of 28 Financial and other competing interests for principal investigators for the overall trial and each study site 21  
20 interests  
21  
22 Access to data 29 Statement of who will have access to the final trial dataset, and disclosure of contractual agreements that 20  
23 limit such access for investigators  
24  
25 Ancillary and post- 30 Provisions, if any, for ancillary and post-trial care, and for compensation to those who suffer harm from trial N/A  
26 trial care participation  
27  
28 Dissemination policy 31a Plans for investigators and sponsor to communicate trial results to participants, healthcare professionals, 2  
29 the public, and other relevant groups (eg, via publication, reporting in results databases, or other data  
30 sharing arrangements), including any publication restrictions  
31  
32 31b Authorship eligibility guidelines and any intended use of professional writers Authorship  
33 contributions  
34 detailed in BMJ  
35 submission system  
36  
37 31c Plans, if any, for granting public access to the full protocol, participant-level dataset, and statistical code 20  
38  
39

40 **Appendices**

|   |                  |    |                                                                                                           |                |
|---|------------------|----|-----------------------------------------------------------------------------------------------------------|----------------|
| 1 |                  |    |                                                                                                           |                |
| 2 |                  |    |                                                                                                           |                |
| 3 | Informed consent | 32 | Model consent form and other related documentation given to participants and authorised surrogates        | <u>  N/A  </u> |
| 4 | materials        |    |                                                                                                           |                |
| 5 |                  |    |                                                                                                           |                |
| 6 | Biological       | 33 | Plans for collection, laboratory evaluation, and storage of biological specimens for genetic or molecular | <u>  N/A  </u> |
| 7 | specimens        |    | analysis in the current trial and for future use in ancillary studies, if applicable                      |                |
| 8 | <hr/>            |    |                                                                                                           |                |

9 \*It is strongly recommended that this checklist be read in conjunction with the SPIRIT 2013 Explanation & Elaboration for important clarification on the items.  
10 Amendments to the protocol should be tracked and dated. The SPIRIT checklist is copyrighted by the SPIRIT Group under the Creative Commons  
11 "[Attribution-NonCommercial-NoDerivs 3.0 Unported](#)" license.  
12  
13  
14  
15  
16  
17  
18  
19  
20  
21  
22  
23  
24  
25  
26  
27  
28  
29  
30  
31  
32  
33  
34  
35  
36  
37  
38  
39  
40  
41  
42  
43  
44  
45  
46  
47
